1 **Blood, sweat and tears: a review of non-invasive DNA sampling**

2 **M.-C. LEFORT\***, *Laboratoire d'Écologie et Biologie des Interactions (EBI) – UMR 7267 CNRS,*  
3 *Université de Poitiers, 5 rue Albert Turpain, 86073 POITIERS Cedex 9, France | Environmental*  
4 *and Animal Sciences, Unitec Institute of Technology, 139 Carrington Road, Mt*  
5 *Albert, Auckland 1025, New Zealand.*

6 **R. H. CRUICKSHANK**, *Department of Ecology, Faculty of Agricultural and Life Sciences, PO*  
7 *Box 85084, Lincoln University, Lincoln 7647, Christchurch, New Zealand.*

8 **K. DESCOVICH**, *Environmental and Animal Sciences, Unitec Institute of Technology, 139*  
9 *Carrington Road, Mt Albert, Auckland 1025, New Zealand. | Centre for Animal Welfare and*  
10 *Ethics, University of Queensland, Gatton 4343, Queensland, Australia*

11 **N. J. ADAMS**, *Environmental and Animal Sciences, Unitec Institute of Technology, 139*  
12 *Carrington Road, Mt Albert, Auckland 1025, New Zealand.*

13 **A. BARUN**, *Department of Ecology, Faculty of Agricultural and Life Sciences, PO Box 85084,*  
14 *Lincoln University, Lincoln 7647, Christchurch, New Zealand.*

15 **A. EMAMI-KHOYI**, *Centre for Ecological Genomics and Wildlife Conservation, University of*  
16 *Johannesburg, Auckland Park 2006, South Africa | Department of Ecology, Faculty of*  
17 *Agricultural and Life Sciences, PO Box 85084, Lincoln University, Lincoln 7647, Christchurch,*  
18 *New Zealand.*

19 **J. RIDDEN**, *Department of Ecology, Faculty of Agricultural and Life Sciences, PO Box 85084,*  
20 *Lincoln University, Lincoln 7647, Christchurch, New Zealand.*

21 **V. R. SMITH**, *Department of Ecology, Faculty of Agricultural and Life Sciences, PO Box 85084,*  
22 *Lincoln University, Lincoln 7647, Christchurch, New Zealand.*

23 **R. SPRAGUE**, *Bio-Protection Research Centre, PO Box 85084, Lincoln University, Lincoln 7647,*  
24 *Christchurch, New Zealand.*

25 **B. R. WATERHOUSE**, *Bio-Protection Research Centre, PO Box 85084, Lincoln University,*  
26 *Lincoln 7647, Christchurch, New Zealand.*

27 **S. BOYER\***, *Institut de Recherche sur la Biologie de l'Insecte (IRBI) – UMR 7261 CNRS /*  
28 *Université de Tours, Parc Grandmont, 37200 Tours, France*

29

30 *\*Corresponding authors: lefortmc@gmail.com and stephane.boyer@univ-tours.fr*

31

32

33 **SUMMARY**

34 The use of DNA data is ubiquitous across animal sciences. DNA may be obtained from an  
35 organism for a myriad of reasons including identification and distinction between cryptic  
36 species, sex identification, comparisons of different morphocryptic genotypes or  
37 assessments of relatedness between organisms prior to a behavioural study. DNA should be  
38 obtained while minimizing the impact on the fitness, behaviour or welfare of the subject  
39 being tested, as this can bias experimental results and cause long-lasting effects on wild  
40 animals. Furthermore, minimizing impact on experimental animals is a key Refinement  
41 principle within the “3Rs” framework which aims to ensure that animal welfare during  
42 experimentation is optimised. The term ‘non-invasive DNA sampling’ has been defined to  
43 indicate collection methods that do not require capture or cause disturbance to the animal,

44 including any effects on the behaviour or fitness. In practice this is not always the case, as  
45 the term ‘non-invasive’ is commonly used in the literature to describe studies where animals  
46 are restrained or subjected to aversive procedures. We reviewed the non-invasive DNA  
47 sampling literature for the past six years (346 papers published in 2013-2018) and uncovered  
48 the existence of a significant gap between the current use of this terminology (i.e. ‘non-  
49 invasive DNA sampling’) and its original definition. We show that 58% of the reviewed  
50 papers did not comply with the original definition. We discuss the main experimental and  
51 ethical issues surrounding the potential confusion or misuse of the phrase ‘non-invasive DNA  
52 sampling’ in the current literature and provide potential solutions. In addition, we introduce  
53 the terms ‘non-disruptive’ and ‘minimally disruptive’ DNA sampling, to indicate methods  
54 that eliminate or minimise impacts not on the physical integrity/structure of the animal, but  
55 on its behaviour, fitness and welfare, which in the literature reviewed corresponds to the  
56 situation for which an accurate term is clearly missing. Furthermore, we outline when these  
57 methods are appropriate to use.

58

59

60 KEYWORDS: eDNA, animal behaviour, fitness, refinement, animal welfare

61

62

### 63 **1. DNA COLLECTION AND THE NON-INVASIVE MISNOMER**

64

65 DNA data are becoming increasingly important in animal biology <sup>1</sup>, both for experimental  
66 and observational studies. This is partially driven by the progressively cheaper and more  
67 user-friendly ways of accessing genomic information <sup>2</sup>. Analysis of genetic material provides  
68 data for myriad uses. In addition to analysis of phylogenetic relationships or population  
69 genetics, DNA analysis is required to determine basic information about individuals of many  
70 species <sup>3</sup>. When DNA analysis is required for purposes such as sexing, kinship and  
71 differentiation between cryptic species prior to experimentation, the DNA sampling  
72 procedure could bias the results of the subsequent experiment. It is therefore essential to  
73 minimise the effect that DNA sampling can have on the fitness or behaviour of the subject  
74 being tested. Furthermore, ethical use of animals in experimentation is guided by the ‘3Rs’  
75 framework of Refinement, Replacement and Reduction (e.g. <sup>4</sup>). The impact of DNA collection  
76 is particularly relevant to the principle of Refinement where techniques with the lowest

77 impact on the animal model should be used whenever possible. Refinement of  
78 experimentation is only possible when impact on the animal is accurately identified.

79

80 Methods of DNA collection were originally defined as ‘non-invasive’ if “the source of the  
81 DNA is left behind by the animal and can be collected without having to catch or disturb the  
82 animal”<sup>5,6</sup>, for example when genetic material was left behind in traces or scats (i.e. *sensu*  
83 environmental DNA (eDNA)), implicitly avoiding any impact on animal welfare. However,  
84 DNA collection is not restricted to that of eDNA, and the term non-invasive has often been  
85 subsequently misapplied in the literature<sup>7</sup>. In practice, so-called ‘non-invasive’ methods  
86 have often encompassed DNA collection techniques that preserve the physical integrity of  
87 an organism but have an unmeasured, and potentially significant, impact on the fitness,  
88 behaviour or welfare of the subject being studied. For example, the following DNA collection  
89 methods were all defined as ‘non-invasive’ by the respective authors: gentle pressure  
90 applied to the thorax and abdomen of carabid beetles (*Poecilus cupreus*) to trigger  
91 regurgitation<sup>8</sup>; flushing of sage-grouses (*Centrocercus urophasianus*) from their roost sites  
92 to collect fresh faecal pellets<sup>9</sup>; and trapping, handling and cloacal swabbing of lizards  
93 (*Phrynosoma cornutum*)<sup>10</sup>. Misleading use of terminology in biology and ecology is a  
94 longstanding concern<sup>11-13</sup>. As with many other terms in biology the phrase “non-invasive  
95 DNA sampling” has been used in many different and inconsistent ways by various authors.  
96 This is problematic for assessing impact on animals, identifying opportunities for refinement,  
97 and for ensuring validity and quality of the data collected. To demonstrate the extent of the  
98 issue, we conducted a systematic review of the recent literature (2013-2018) and evaluated  
99 how well papers using the term “non-invasive DNA sampling” complied with the original  
100 definition by Taberlet et al.<sup>6</sup>.

## 101 2. METHOD

102 We conducted a keyword-based search on the Web Of Science core collection using the  
103 keywords DNA and non-invasive or DNA and noninvasive (as both spellings were originally  
104 proposed and are in common use<sup>5,6</sup>). We restricted our search to articles published in  
105 relevant disciplines and between 2013 and 2018. The search command used was the  
106 following:

107 (TS=((dna AND non-invasive) OR (dna AND noninvasive)) AND SU=(ecology OR zoology OR  
108 ornithology OR ecology OR environmental sciences OR entomology OR fisheries OR  
109 behavioural science OR Biodiversity & Conservation) AND PY=(2013 OR 2015 OR 2017 OR  
110 2014 OR 2016 OR 2018))

111 Results were then refined to experimental papers written in English. On the 9th of July 2018,  
112 this search yielded 377 articles. We screened these articles retaining those in which animal  
113 DNA samples were actually collected, leading to 355 articles, and removed articles with  
114 insufficient methodological information. A total of 346 papers were retained in our final  
115 dataset (see list in supplementary file 1). Although this dataset may not be exhaustive; it is  
116 taken to be representative of the current literature on non-invasive DNA sampling.

117 During the same time period and in the same fields as above, we estimated the total number  
118 of articles focusing on invertebrates versus vertebrates using the following commands:

- 119 • (TS=(mammal) OR TS=(vertebrate) OR TS=(bird) OR TS=(amphibian) OR TS=(reptile)  
120 OR TS=(fish) NOT (TS=(insect) OR TS=(invertebrate) OR TS=(crustaceans) OR  
121 TS=(annelid) OR TS=(echinoderm) OR TS=(nematelminth) OR TS=(arachnids) OR  
122 TS=(arthropod) OR TS=(plathelminth)) AND SU=(ecology OR zoology OR ornithology  
123 OR ecology OR environmental sciences OR entomology OR fisheries OR behavioural  
124 science OR Biodiversity & Conservation) AND PY=(2013 OR 2015 OR 2017 OR 2014  
125 OR 2016 OR 2018))
- 126 • (TS=(insect) OR TS=(invertebrate) OR TS=(crustaceans) OR TS=(annelid) OR  
127 TS=(echinoderm) OR TS=(nematelminth) OR TS=(arachnids) OR TS=(arthropod) OR  
128 TS=(plathelminth) NOT (TS=(mammal) OR TS=(vertebrate) OR TS=(bird) OR  
129 TS=(amphibian) OR TS=(reptile) OR TS=(fish)) AND SU=(ecology OR zoology OR  
130 ornithology OR ecology OR environmental sciences OR entomology OR fisheries OR  
131 behavioural science OR Biodiversity & Conservation) AND PY=(2013 OR 2015 OR  
132 2017 OR 2014 OR 2016 OR 2018))

133 The results from these searches were used as non-exhaustive but comparable numeric  
134 estimates only, and were therefore not further curated.

135

### 136 **3. THE SEVEN DEADLY SINS OF NON-INVASIVE DNA SAMPLING**

137

138 Our systematic review revealed that 58% of papers using the phrase “non-invasive” or  
139 “noninvasive” did not comply with the original definition given by Taberlet et al. <sup>6</sup> (Fig 1a).  
140 This was the case even when this phrase was present in the title of the article (58% of non-  
141 complying articles). We summarise below the main issues exposed by our literature search  
142 in a list of seven sins.

143

144 **3.1. Sin 1: Taxonomic bias**

145 One conspicuous result from our review was that only 18 studies (~5% of the reviewed  
146 papers) focused on invertebrates compared to 324 focusing on vertebrates (Fig 1b). This  
147 striking imbalance implies that non-invasive methods are rarely considered for sampling  
148 invertebrate DNA. Even when authors claimed to use non-invasive DNA sampling on  
149 invertebrates, they used methods that alter the physical integrity of the organism in 40% of  
150 the cases (Fig 1d). For example, Rorat et al.<sup>14</sup> collected individual earthworms, which they  
151 then electrified “lightly” to induce coelomic secretion. Yet, truly non-invasive methods exist  
152 for invertebrates, for example through field collection of insect exuviae<sup>15</sup>, pupal cases<sup>16</sup>,  
153 empty mummies<sup>17</sup>, dust<sup>18</sup> or water samples<sup>19</sup>.

154  
155 The use of non-invasive DNA sampling and the misuse of the term also varies in relation to  
156 the taxonomic group of interest within vertebrates (Fig.1c) ( $\chi^2 = 165.17$ ,  $df = 30$ ,  $p < 2.2e-$   
157  $16$ ). For example, 43% of the studies on fish involved alteration of the physical integrity of  
158 the organism. These included fin clipping in eels (*Anguilla anguilla*)<sup>20</sup> and sting amputation  
159 in rays (*Aetobatus narinari*)<sup>21</sup> which were both considered non-invasive because these body  
160 parts can regenerate and despite the fact that fin clipping is known to be painful for fish<sup>22</sup>. It  
161 is difficult to imagine employing such sampling methods on mammals and still calling them  
162 non-invasive. Of the reviewed studies focused on mammals, only 3% involved biopsies.

163

164 **3.2. Sin 2: Misclassification of faeces as non-invasive DNA samples**

165 The majority of the literature on non-invasive DNA sampling included the collection of faecal  
166 samples (58% of all studies reviewed here). Faecal collection is so prevalent in the field that  
167 it seems almost automatically considered non-invasive by most authors. However, our  
168 analysis shows that 47 % of the studies focusing solely on faecal sampling did not comply  
169 with the original definition of non-invasive DNA sampling. This included detection of animals  
170 and collection of faecal samples using aircraft (e.g.<sup>23</sup>), which may increase stress in animals  
171 (e.g.<sup>24</sup>) or cases where the animal were captured or even killed to obtain faecal samples. For  
172 example, Kierepka et al.<sup>25</sup> obtained faecal samples from feral pigs (*Sus scrofa*) by culling the  
173 animals and squeezing faecal pellets out of the pigs’ rectum shortly after death. Such  
174 procedures clearly violate the definition proposed by Taberlet et al.<sup>6</sup> (see also Sin 6). Rather  
175 than the type of sample, it is the method of sampling that needs to be scrutinized for its  
176 invasiveness. Another key issue with faecal sampling is that many animals mark their

177 territory using faeces to dissuade potential intruders (e.g. in wolf communities, see <sup>26</sup>) and  
178 also use such marks to recognise individuals from neighbouring territories, avoid  
179 unnecessary conflict and promote non-agonistic social encounter such as mating. Therefore,  
180 even when collected opportunistically after the animal has left, faecal sampling can in some  
181 cases affect the marking behaviour of territorial species (e.g. <sup>27</sup>) (Fig 1a). Such effect will  
182 likely vary with the ecology of the taxa studied but can be particularly significant for small  
183 animals when the entire scat is collected, or if undertaking repeated sampling (e.g. <sup>28</sup>). The  
184 collection of samples from territory boundaries must therefore aim to preserve territory  
185 delineation and socially relevant information. Unless the species is known to be non-  
186 territorial or marks its territory with cues other than those collected (e.g. maned wolves  
187 (*Chrysocyon brachyurus*) mark their territories with urine <sup>29</sup>), precautions should be taken to  
188 avoid impacts on marking and other social behaviours. These risks could be easily alleviated  
189 by only collecting a small portion of a faecal sample. We recorded six studies where this  
190 issue was clearly addressed either by swabbing faeces without removal <sup>30</sup> or by only  
191 collecting scat subsamples <sup>31–35</sup>.

192  
193

### 194 **3.3. Sin 3: Baiting DNA traps**

195 In most studies using a DNA trapping strategy (89%), researchers employed bait or lures to  
196 increase the yield of their traps. Very few studies used non-lured DNA traps, for example,  
197 barb wire placed at sites that were known to be used by brown bears (*Ursus arctos*) <sup>36,37</sup> or  
198 modified body snares at otter (*Lontra canadensis*) latrine sites to collect hair <sup>38</sup>.  
199 Although it seems perfectly legitimate (and often essential) to increase the attractiveness of  
200 DNA traps with food <sup>39</sup>, scent marks from other individuals <sup>40</sup> or other attractants (e.g.  
201 Valerian essence for cats) <sup>41</sup>, the animal's behaviour will obviously be disturbed as a  
202 consequence and therefore, these methods cannot be considered fully non-invasive sensu  
203 Taberlet et al. <sup>6</sup>.

204  
205

### 206 **3.4. Sin 4: Combining invasive and non-invasive methods**

207 In a few examples the impact of the sampling strategy on the animal behaviour is obvious  
208 from the article's title itself, for example when baited traps are mentioned (e.g. <sup>41</sup>).  
209 However, in many more papers (n=31) confusion arises from authors who used the phrase

210 "non-invasive sampling" while a variety of sampling techniques were actually applied, some  
211 of which non-invasive and some of which were invasive sensu Taberlet et al. <sup>6</sup>. This lack of  
212 clarity about what is non-invasive and what is not can be misleading for the reader. Some  
213 authors clearly stated the invasiveness of the different methods used (e.g. <sup>42-45</sup>), however,  
214 most papers (71%) where mixed DNA sampling strategies were applied did not specify which  
215 of these methods were considered non-invasive.

216 Another facet of this issue arises when tools (e.g. new primers, extraction protocols, DNA  
217 conservation methods) are developed specifically for analysing samples collected non-  
218 invasively but are tested only (or partly) on samples that were collected invasively (n=18) for  
219 example by capturing animals to perform the sampling (e.g. <sup>46,47</sup>).

220

### 221 **3.5. Sin 5: A bird in the hand is no better than two in the bush**

222 Trapping and restraint of wild animals is recognised as a significant stressor that can result in  
223 distress, injury, and death (e.g. <sup>48</sup>). Capturing and/or handling animals for DNA sampling was  
224 observed in 26% of all articles reviewed here (Fig 1c), despite the clear definition given by  
225 Taberlet et al. <sup>6</sup> that non-invasive DNA is "collected without having to catch or disturb the  
226 animal". Indeed, capture and/or handling of individuals to obtain DNA samples (e.g. saliva  
227 swabbing) can induce long-lasting stress effects <sup>49,50</sup>, and there are very few cases where  
228 capturing an animal might have no effects on its future behaviour. Therefore, when animals  
229 must be held captive, transported or restrained in order to perform DNA sampling, the  
230 method cannot meet the definition of non-invasive DNA sampling sensu stricto <sup>6</sup>. Skin  
231 swabbing of octopus (*Enteroctopus dofleini*) for example <sup>51</sup>, is unlikely to be possible in the  
232 wild without disturbing the animal and the potential negative impacts on animal welfare  
233 (see <sup>52</sup> for a review) must still be recognised.

234 Another common scenario where the animals are held for DNA sampling relates to the use  
235 of museum specimens or killed for other purposes (n=6). Whether they were legally hunted  
236 or poached and confiscated (e.g. <sup>53</sup>, this type of sampling does not qualify as non-invasive  
237 due to the disturbance and/or death of the animal through human activity. Often, a better  
238 term for such sampling is "non-destructive", which that does not damage the specimen <sup>54,55</sup>  
239 (Table 1). On the other hand, tissue sampling from animals that were found dead of natural  
240 causes is analogous to eDNA left behind by a free ranging animal and can be considered non-  
241 invasive (e.g. <sup>56</sup>). It should be noted, however, that opportunistic sampling from animals  
242 already killed for other purposes (e.g. culling, museum samples) may be an ethical option

243 because it reduces the need to otherwise target living animals and conforms to the principle  
244 of Reduction (reducing the number of affected animals) under the 3Rs framework.

245

### 246 **3.6. Sin 6: All or nothing**

247 Only 42% of the reviewed studies fully met the criteria of the original definition of non-  
248 invasive DNA sampling. In most cases, however, authors tried to minimise the impact of  
249 sampling, but the nature of the definition proposed by Taberlet et al. <sup>6</sup> leaves no middle  
250 ground between invasive and non-invasive sampling methods. One potential solution to this  
251 is to use the term “minimally-invasive DNA sampling”, which can be defined as obtaining  
252 DNA with minimised effects on the animal’s structural/physical integrity, and potential  
253 impact on the behaviour and welfare of the organism (Table 1). In our dataset, this term was  
254 used in six studies to qualify skin swabbing of fish <sup>57</sup>, amphibians <sup>58</sup> and bats <sup>59</sup>, feather  
255 plucking of gulls <sup>60</sup>, cloacal swabbing in rattlesnakes <sup>61</sup> and ear biopsies in rodents <sup>62</sup>. A  
256 broader use of this term would lead to more accurate reporting, for which potential impacts  
257 of the sampling are acknowledged, while still emphasising the aspiration of the authors to  
258 minimise those impacts. The challenge associated with the use of such a term would be to  
259 define where ambiguities fall between minimally-invasive and invasive sampling methods.

260

### 261 **3.7. Sin 7: Using the common signification of non-invasive sampling**

262 The lack of perceived stress or pain experienced by an animal is often used as a criterion to  
263 support the non-invasive classification of the method used. For example, du Toit et al. <sup>63</sup>  
264 stated that “Pangolin scales consist of non-living keratin, therefore taking scale clippings is  
265 considered to be non-invasive”. This statement relates to the common definition of a “non-  
266 invasive” medical or veterinary procedure, i.e. one that does not involve puncture of the skin  
267 or other entry into the body <sup>64</sup>. This definition (rather than the one by Taberlet et al. <sup>6</sup>)  
268 seems to be the one adopted by most authors as 92.5% of the reviewed papers complied  
269 with this definition (Fig 1d). This was also the case for several articles at the frontier  
270 between medical/veterinary fields. Kauffman et al. <sup>65</sup> for example, called the sampling of  
271 vaginal swabs and urine from captive dogs non-invasive. Similarly, Reinardy et al. <sup>66</sup>  
272 designated as ‘non-invasive’ a procedure consisting of “lightly anaesthetizing fish and  
273 applying a slight pressure on their abdomen to expel sperm”, which was then used for DNA  
274 analysis. These examples were rare in our dataset (n=3) probably because of our strict  
275 selection of articles from non-medical and non-veterinary domains (see selected fields in



276 section 2). Nonetheless, as science becomes increasingly transdisciplinary and genetic  
277 methods developed in neighbouring fields are used in ecology, this type of confusion is likely  
278 to become more prevalent in the future. The discrepancy with the common definition of a  
279 non-invasive procedure comprises a significant limitation of the phrase non-invasive DNA  
280 sampling as defined by Taberlet et al. <sup>6</sup>, and importantly, could minimise the perceived  
281 impacts of sampling methods on animal welfare, even if these impacts are significant in  
282 reality. Although this issue was first highlighted in 2006 by Garshelis who stated that: “the  
283 term noninvasive has 2 distinct meanings, 1 biological and 1 generic, which have become  
284 intertwined in the wildlife literature” <sup>7</sup>, the confusion continues to riddle the current  
285 literature.

286

#### 287 **4. INTRODUCING THE TERMS NON-DISRUPTIVE AND MINIMALLY DISRUPTIVE DNA** 288 **SAMPLING**

289 In order to clarify some of the existing discrepancies exposed by our literature review, we  
290 propose the introduction of the term, ‘non-disruptive DNA sampling’, that emphasises the  
291 effects of the sampling method not on the physical integrity/structure, but on the fitness  
292 and behaviour of the organism from which the sample is obtained. We define ‘non-  
293 disruptive DNA sampling’ as obtaining DNA from an organism without affecting its fitness, or  
294 causing any behaviour or welfare impact that may last longer than the duration of the  
295 sampling (Table 1). We define ‘minimally disruptive DNA sampling’ as any sampling method  
296 that minimises impacts on fitness, behaviour and welfare. Non-disruptive DNA sampling can  
297 be differentiated from ‘non-invasive DNA sampling’ which in the current literature, largely  
298 focuses on whether the method of sampling impacts physical structures of the animal (Fig  
299 1d). The introduction of ‘non-disruptive DNA sampling’ terminology provides a functional  
300 term that appropriately focuses on the impact to the individual and not on a specific quality  
301 of the methodology (e.g. whether a physical structure is altered). We acknowledge that very  
302 few current DNA sampling methods may be entirely non-disruptive, and recommend that  
303 researchers aim at minimising disruption through protocol Refinement. This could be  
304 achieved by testing the potential effects of different DNA sampling methods on 1) survival,  
305 2) stress, 3) behaviour and 4) reproduction success as a proxy for fitness. In order to make  
306 our intended meaning clear, we overlaid existing DNA sampling terms in relation to non-  
307 disruptive DNA sampling methods in the following paragraphs and in Figure 2. Rather than  
308 debating and refining existing terms, the essential point of Figure 2 is to distinguish between

309 disruptive methods, which are likely to cause lasting effects on the behaviour, welfare or  
310 fitness of an organism, and non-disruptive ones, which may not.

311

#### 312 **4.1. Impact of DNA sampling on behaviour, fitness and welfare**

313 Studies examining the effect of DNA sampling on behaviour, fitness and welfare are rare and  
314 their results are not always predictable. For example, the fitness consequences of DNA  
315 sampling methods, often measured using individual survival as a proxy for fitness (e.g. <sup>67-69</sup>),  
316 depends on the taxa sampled. Responses may vary strongly between species <sup>70</sup> and even  
317 between males and females of the same species. For instance, Vila *et al.* <sup>71</sup> showed that the  
318 non-lethal but invasive DNA sampling through leg or hind wing clipping had an effect on  
319 survivorship and reproductive behaviour of adult males of the protected moth *Graellsia*  
320 *isabellae*, while mid leg clipping had a negative impact on female mating success. In  
321 particular cases, DNA sampling can also increase the fitness of animals. For example,  
322 supplementary feeding can have a direct positive impact on the fitness of birds <sup>72</sup>, and this  
323 may occur when animals are attracted to DNA traps baited with food or feeding cages where  
324 animals are caught for DNA sampling (e.g. <sup>73</sup>). In mammals, remote DNA sampling using  
325 biopsy darts is known to cause little reaction from marine mammals when conducted  
326 correctly and is unlikely to produce long-term deleterious effects <sup>74</sup>. Gemmell and Majluf <sup>75</sup>  
327 found that in most cases New Zealand fur seals (*Arctocephalus forsteri*) recoiled from the  
328 impact and searched briefly for the assailant, but never abandoned their territory following  
329 the darting. Another study found that bottlenose dolphins (*Tursiops* spp) reacted similarly to  
330 the darting process regardless of being hit or not, suggesting that the reaction is mainly  
331 caused by 'unexpected disturbance' rather than biopsy <sup>76</sup>. No sign of long term altered-  
332 behaviours was observed, including probability of recapture. Despite this, all biopsy  
333 sampling involves some level of risk <sup>74</sup>, and different individuals from the same species may  
334 react differently to similar stressful situations depending on gender <sup>77</sup> or individual  
335 physiological and psychological factors <sup>78,79</sup>. With regards to animal welfare, Paris *et al.* <sup>80</sup>  
336 assessed the impact of different DNA sampling methods on individual welfare in frogs. They  
337 concluded that capture and toe clipping was significantly worse than capture and buccal  
338 swabbing in terms of the level of suffering experienced by an animal, and the level of  
339 suffering combined with shortened lifespan. These examples illustrate that the level of  
340 disruptiveness of DNA sampling methods should not be presumed and studies assessing  
341 their impact on fitness, behaviour and welfare should be encouraged prior to use.

342

343

344 **4.2. Examples of non-disruptive or minimally disruptive DNA sampling**

345 Non-disruptive DNA sampling comprises all non-invasive DNA sampling *sensu stricto* i.e.  
346 when the DNA is collected without the subjects being aware of the researcher's presence or  
347 experiencing any detrimental effects (as suggested in Taberlet & Luikart<sup>5</sup>). For example,  
348 most eDNA sampling and DNA trapping methods do not require researcher and subject to be  
349 present at the same time and place. An important point of difference between these two  
350 methods is that eDNA is often collected somewhat opportunistically, while DNA trapping  
351 allows for strategic spatial distribution of sampling.

352 Examples of DNA trapping that are non-disruptive include remote plucking or hair trapping  
353 by means of unbaited hair snag traps<sup>81,82</sup> or tape<sup>83,84</sup> placed at well-used runs.  
354 Environmental DNA sampling includes field collection of faeces (e.g.<sup>29</sup>) as long as these do  
355 not affect territory marking (see section 3.2), DNA collection from footprints in the snow,  
356 such as those from the Swedish Arctic fox (*Vulpes lagopus*)<sup>85</sup>, and from saliva on twigs, such  
357 as from ungulate browsing<sup>86</sup>. When DNA is collected in the presence of the animal, the  
358 effects of sampling can be minimised by avoiding or drastically limiting handling. For  
359 example, the swabbing of animals directly in the field with little<sup>87</sup> or no handling<sup>88</sup>.

360 Sampling methods that are non-disruptive have many benefits for wildlife conservation,  
361 because they are unlikely to introduce bias or experimental effect or impact on animal  
362 welfare. However, they may be limited in their applicability. The main limitations associated  
363 with eDNA and DNA trapping include low DNA quantity and quality<sup>89</sup>, as well as potential  
364 contamination from non-target species<sup>90</sup>. Another limitation of DNA trapping might be the  
365 mixture of DNA from several different target individuals. In such instances, next-generation  
366 sequencing (NGS) or other post-PCR analysis (e.g. cloning, single stranded conformation  
367 polymorphism, high resolution melting, denaturing gradient gel electrophoresis) might be  
368 required to differentiate and identify the DNA of each individual.

369 A shift in focus from sampling methods that aim at avoiding breaches to physical structures  
370 of an organism, to non-disruptive or minimally disruptive methods, (avoiding impact on  
371 behaviour, fitness or welfare), means in some cases the most appropriate method may be  
372 invasive but results in a lower impact on the animal. For example, invertebrate antenna  
373 clipping in the natural environment breaches a physical structure but may result in no effect  
374 on survival (e.g.<sup>69</sup>) and may have lower impacts than collecting and removing specimen to  
375 captivity for faecal sampling or forced regurgitation.

376 Similarly, remote dart biopsy or flipper notching of marine mammals are often a preferred  
377 choice over stressful captures for DNA sampling because they only cause short term effect (if  
378 any) on the behaviour of the animal<sup>91,92</sup>. Under our definitions, hair collection from the  
379 environment, unbaited DNA traps, skin swabbing in the field or remote darting on wild sea  
380 mammals could be considered non- or minimally disruptive (Figure 2).

381

## 382 **5. WHEN IS NON-DISRUPTIVE DNA REQUIRED OR PREFERRED?**

383 Non-disruptive DNA sampling provides a compromise between minimising welfare and  
384 ethical costs, and obtaining a quality DNA sample. DNA sampling methods where the  
385 specimen is in hand generally results in fresher and better-quality DNA, despite the  
386 potentially higher impact on animal behaviour or welfare. While the welfare of all  
387 experimental animals should be considered, when the subject is endangered or afforded  
388 legal protections there may be additional welfare and/or ethical issues surrounding the use  
389 of invasive DNA sampling techniques<sup>67,93</sup>. Additionally, the test subject may be required to  
390 be alive for further testing or return to their natural habitat. If further tests involve capturing  
391 an animal for a laboratory experiment<sup>94</sup> or for translocation<sup>95</sup>, then the effects of capturing  
392 and holding the organisms for DNA sampling are of less concern as individuals will need to  
393 be captured for these experiments anyway. However, stressful events can have a cumulative  
394 effect<sup>96</sup> therefore the potential further exacerbation of stress by DNA sampling should be  
395 carefully considered.

396 The importance of considering non-disruptive DNA sampling also depends on the type of  
397 study undertaken. Below we describe experimental studies, field behavioural studies, and  
398 capture mark recapture (CMR) research, as three types of situations in which collection and  
399 use of non-disruptive DNA samples may be essential.

400

### 401 **5.1. Laboratory-based experimentations**

402 Non-disruptive DNA sampling is necessary for species identification, sexing or genotyping of  
403 individuals prior to laboratory-based experimentation where fitness and/or behavioural  
404 traits are to be assessed. For example, many species of birds are monomorphic, and can only  
405 be sexed using molecular analysis<sup>97</sup>. Similarly, many cryptic species complexes can only be  
406 elucidated genetically<sup>98</sup>. Laboratory-based behavioural or fitness studies involving cryptic or  
407 monomorphic species may therefore require DNA sexing or species identification of  
408 individuals before conducting research on them<sup>94,99</sup> to ensure a balance of sex or species

409 across different treatments. Even when species identification is not an issue, the organisms  
410 being studied may comprise different morphocryptic genotypes<sup>99</sup> that need to be  
411 determined prior to experimentation in a way that does not affect their fitness or behaviour.  
412

### 413 **5.2. Behavioural studies in the field**

414 The second major use of non-disruptive DNA sampling is when relatedness between  
415 individual subjects needs to be determined prior to a behavioural study conducted in the  
416 field. For example, social interactions in mammals are often linked to kinship and can be  
417 mediated by the physiological state of individuals<sup>100</sup>. The capture and handling of animals  
418 can modify their physiology<sup>101</sup>, thereby affecting their social behaviour. Recent studies also  
419 suggest that although behaviours observed shortly after release may appear ‘normal’, stress  
420 levels may still be high and impact activity budgets<sup>102</sup>. Such effects may remain undetected  
421 but have significant implications for subsequent data reliability and validity.  
422

### 423 **5.3. Capture Mark Recapture**

424 The effects of DNA sampling on animal behaviour may also affect the results of studies that  
425 are not directly examining behaviour or fitness. The third case when non-disruptive DNA  
426 sampling is recommended is when doing Capture Mark Recapture (CMR) studies. CMR  
427 studies using DNA tagging are often conducted to estimate population size (e.g.<sup>103</sup>), with the  
428 additional benefit of enabling population genetic analysis on the samples collected. Invasive  
429 or disruptive DNA sampling techniques may affect the survival rate of marked individuals, or  
430 introduce avoidance behaviours, which may cause trap avoidance, and the population size  
431 to be overestimated. For example, toe clipping combined with CMR is commonly used to  
432 estimate population abundance of amphibians<sup>104</sup>, but toe clipping has been shown to  
433 decrease chances of frog recapture by 4 to 11 % for each toe removed<sup>67</sup>. Similarly, sampling  
434 methods that may increase the fitness of animals (e.g. feeding cages or baited DNA traps)  
435 could lead to previously sampled animals to be more attracted than naïve ones (Boulanger  
436 et al. 2004, Gashelis 2006), thereby biasing the CMR results towards underestimating  
437 population size.  
438

439 Such biases can be limited by the use of non-disruptive DNA sampling methods. Although  
440 eDNA has been used in CMR studies and is in most cases non-disruptive, it can have some  
441 limitations. The presence of mixed DNA samples and the lower quality of the collected DNA  
442 can lead to false positives where animals not captured previously are believed to be

443 recaptured due to their DNA profile being an indistinguishable shadow of previously  
444 captured animals <sup>105</sup>. Because of this, non-disruptive DNA sampling may provide an  
445 appropriate balance between sample quality, data quality and impact on animals.

446

447

## 448 **6. TAKE-HOME MESSAGES**

449 1. In practice, most papers using the phrase “non-invasive DNA sampling” only comply  
450 to the medical definition of the term non-invasive, which is broader than the original  
451 definition proposed by Taberlet et al. <sup>6</sup> and is concerned only with the preservation of the  
452 physical integrity of the organism being sampled. We urge scientists using non-invasive DNA  
453 sampling methods to always state whether they refer to the definition by Taberlet et al. <sup>6</sup>  
454 *sensu stricto* or the medical definition of a non-invasive procedure (*sensu lato*).

455 2. We propose the new terms, “non-disruptive” and “minimally-disruptive” DNA  
456 sampling, to more appropriately address the potential behaviour, welfare and/or fitness  
457 effects of DNA sampling methods, as opposed to physical integrity (invasiveness in the  
458 medical sense). We can envisage situations in which the research aims are not impacted by  
459 the sampling approach to obtaining DNA. However, researchers have an ethical obligation  
460 to minimise the impacts on the animals. Therefore, whenever possible, non-disruptive or  
461 minimally disruptive DNA sampling methods should be selected, in particular prior to  
462 experimental or observational studies measuring fitness or behaviour, as well as studies  
463 using techniques such as CMR where fitness or behaviour may affect results.

464 3. It may in some cases be better to use a physically invasive method (e.g. remote  
465 biopsy) that is minimally disruptive rather than a method that does not involve puncturing  
466 the skin but causes severe stress and has long-lasting effects (e.g. stressful capture for saliva  
467 swabbing).

468 4. More research is required to better understand the consequences of different live  
469 DNA sampling methods on behaviour, welfare and fitness in a variety of animal species and  
470 contexts.

471

472

## 473 **ACKNOWLEDGEMENT**

474 The authors would like to thank Mehdi Mahjoob (<http://mehdimahjoob.com>), graphic  
475 designer, for his assistance with the preparation of Figure 2, the Environmental and Animal  
476 Sciences Writing Group at Unitec Institute of Technology, and particularly Rebecca Ladyman,  
477 for their valuable feedback on an earlier version of the manuscript.

478

479

#### 480 **AUTHOR CONTRIBUTIONS**

481 Conceptualised the idea: MCL, SB, RHC ; recruited co-authors and organised literature  
482 review and writing workshops: MCL ; conducted the systematic review: MCL, SB ; prepared  
483 the figures: SB ; drafted and revised the manuscript MCL, RHC, NA, AB, KD, AK, JR, VRS, RS,  
484 WB, SB. The overall author percentage contributions are as follow: MCL<sup>25</sup>, RHC<sup>10</sup>, KD<sup>8</sup>, NA<sup>5</sup>,  
485 AB<sup>5</sup>, AK<sup>5</sup>, JR<sup>5</sup>, VRS<sup>5</sup>, RS<sup>5</sup>, BW<sup>2</sup>, SB<sup>25</sup>.

486

487

#### 488 **DATA AVAILABILITY**

489 The list of publications used for the review are available as Supplementary material 1.

490

491

#### 492 **REFERENCES**

- 493 1. Suarez, R. K. & Moyes, C. D. Metabolism in the age of 'omes'. *J. Exp. Biol.* **215**, 2351–7  
494 (2012).
- 495 2. Sboner, A., Mu, X. & Greenbaum, D. The real cost of sequencing: higher than you  
496 think! *Genome Biol.* **12**, 125 (2011).
- 497 3. Hamilton, M. J. & Sadowsky, M. J. DNA Profiling in Ecology. in *Encyclopedia of Life*  
498 *Sciences* (John Wiley & Sons, Ltd, 2010). doi:10.1002/9780470015902.a0005454.pub2
- 499 4. Hollands, C. The animals (scientific procedures) Act 1986. *Lancet* **328**, 32–33 (1986).
- 500 5. Taberlet, P. & Luikart, G. Non-invasive genetic sampling and individual identification.  
501 *Biol. J. Linn. Soc.* **68**, 41–55 (1999).
- 502 6. Taberlet, P., Waits, L. P. & Luikart, G. Noninvasive genetic sampling: look before you  
503 leap. *Trends Ecol. Evol.* **14**, 323–327 (1999).
- 504 7. Garshelis, D. L. On the allure of noninvasive genetic sampling-putting a face to the  
505 name. *Ursus* **17**, 109–123 (2006).
- 506 8. Waldner, T. & Traugott, M. DNA-based analysis of regurgitates: a noninvasive  
507 approach to examine the diet of invertebrate consumers. *Mol. Ecol. Resour.* **12**, 669–  
508 75 (2012).
- 509 9. Baumgardt, J. A. *et al.* A method for estimating population sex ratio for sage-grouse  
510 using noninvasive genetic samples. *Mol. Ecol. Resour.* **13**, 393–402 (2013).
- 511 10. Williams, D. A. *et al.* Development of tetranucleotide microsatellite loci and a non-  
512 invasive DNA sampling method for Texas horned lizards (*Phrynosoma cornutum*).  
513 *Conserv. Genet. Resour.* **4**, 43–45 (2012).
- 514 11. Murphy, D. & Noon, B. Coping with uncertainty in wildlife biology. *J. Wildl. Manage.*  
515 **55**, 773–782 (1991).
- 516 12. Hodges, K. E. Defining the problem: terminology and progress in ecology. *Front. Ecol.*  
517 *Environ.* **6**, 35–42 (2008).

- 518 13. Herrando-Perez, S., Brook, B. W. & Bradshaw, C. J. a. Ecology needs a convention of  
519 nomenclature. *Bioscience* **64**, 311–321 (2014).
- 520 14. Rorat, A. *et al.* Coelomocyte- Derived Fluorescence and DNA Markers of Composting  
521 Earthworm Species. *J. Exp. Zool. PART A-ECOLOGICAL Genet. Physiol.* **321**, 28–40  
522 (2014).
- 523 15. Quynh, N. H., Inn, K. Y., Amaël, B. & Yikweon, J. Efficient isolation method for high-  
524 quality genomic DNA from cicada exuviae. *Ecol. Evol.* **7**, 8161–8169 (2017).
- 525 16. Richter, A. *et al.* More than an empty case: a non invasive technique for monitoring  
526 the Australian critically endangered golden sun moth, *Synemon plana* (Lepidoptera:  
527 Castniidae). *J. Insect Conserv.* **17**, 529–536 (2013).
- 528 17. Lefort, M.-C., Wratten, S., Cusumano, A., Varennes, Y.-D. & Boyer, S. Disentangling  
529 higher trophic level interactions in the cabbage aphid food web using high-  
530 throughput DNA sequencing. *Metabarcoding and Metagenomics* **1**, e13709 (2017).
- 531 18. Madden, A. A. *et al.* The diversity of arthropods in homes across the United States as  
532 determined by environmental DNA analyses. *Mol. Ecol.* **25**, 6214–6224 (2016).
- 533 19. Balasingham, K. D., Walter, R. P., Mandrak, N. E. & Heath, D. D. Environmental DNA  
534 detection of rare and invasive fish species in two Great Lakes tributaries. *Mol. Ecol.*  
535 **27**, 112–127 (2018).
- 536 20. Baillon, L. *et al.* Detecting the exposure to Cd and PCBs by means of a non-invasive  
537 transcriptomic approach in laboratory and wild contaminated European eels (*Anguilla*  
538 *anguilla*). *Environ. Sci. Pollut. Res.* **23**, 5431–5441 (2016).
- 539 21. Janse, M., Kappe, A. L. & Van Kuijk, B. L. M. Paternity testing using the poisonous  
540 sting in captive white-spotted eagle rays *Aetobatus narinari*: a non-invasive tool for  
541 captive sustainability programmes. *J. Fish Biol.* **82**, 1082–1085 (2013).
- 542 22. Roques, J. A. C., Abbink, W., Geurds, F., van de Vis, H. & Flik, G. Tailfin clipping, a  
543 painful procedure: Studies on Nile tilapia and common carp. *Physiol. Behav.* **101**,  
544 533–540 (2010).
- 545 23. Roffler, G. H. *et al.* Lack of sex-biased dispersal promotes fine-scale genetic structure  
546 in alpine ungulates. *Conserv. Genet.* **15**, 837–851 (2014).
- 547 24. Ditmer, M. A. *et al.* Bears show a physiological but limited behavioral response to  
548 unmanned aerial vehicles. *Curr. Biol.* **25**, 2278–2283 (2015).
- 549 25. Kierepka, E. M. *et al.* Identification of robust microsatellite markers for wild pig fecal  
550 DNA. *J. Wildl. Manage.* **80**, 1120–1128 (2016).
- 551 26. Llana, L., García, E. J. & López-Bao, J. V. Intensity of territorial marking predicts wolf  
552 reproduction: implications for wolf monitoring. *PLoS One* **9**, e93015 (2014).
- 553 27. Brzeziński, M. & Romanowski, J. Experiments on sprinting activity of otters (*Lutra*  
554 *lutra*) in the Bieszczady Mountains, southeastern Poland / Observations des épreintes  
555 de la loutre (*Lutra lutra*) sur les montagnes du Bieszczady au sud-est de la Pologne.  
556 *Mammalia* **70**, 58–63 (2006).
- 557 28. Bonesi, L., Hale, M. & Macdonald, D. W. Lessons from the use of non-invasive genetic  
558 sampling as a way to estimate Eurasian otter population size and sex ratio. *Acta*  
559 *Theriol. (Warsz)*. **58**, 157–168 (2013).
- 560 29. Mannise, N., Trovati, R. G., Duarte, J. M. B., Maldonado, J. E. & González, S. Using  
561 non-Invasive genetic techniques to assist in maned wolf conservation in a remnant  
562 fragment of the Brazilian Cerrado. *Anim. Biodivers. Conserv.* **41**, 315–319 (2018).



- 563 30. Klütsch, C. F. C. & Thomas, P. J. Improved genotyping and sequencing success rates  
564 for North American river otter (*Lontra canadensis*). *Eur. J. Wildl. Res.* **64**, 16 (2018).
- 565 31. Piaggio, A. J. *et al.* A noninvasive method to detect Mexican wolves and estimate  
566 abundance. *Wildl. Soc. Bull.* **40**, 321–330 (2016).
- 567 32. Stansbury, C. R. *et al.* A long-term population monitoring approach for a wide-ranging  
568 carnivore: Noninvasive genetic sampling of gray wolf rendezvous sites in Idaho, USA.  
569 *J. Wildl. Manage.* **78**, 1040–1049 (2014).
- 570 33. Wultsch, C., Waits, L. P., Hallerman, E. M. & Kelly, M. J. Optimizing collection methods  
571 for noninvasive genetic sampling of neotropical felids. *Wildl. Soc. Bull.* **39**, 403–412  
572 (2015).
- 573 34. Tsaparis, D., Karaiskou, N., Mertzanis, Y. & Triantafyllidis, A. Non-invasive genetic  
574 study and population monitoring of the brown bear (*Ursus arctos*) (Mammalia:  
575 Ursidae) in Kastoria region-Greece. *J. Nat. Hist.* **49**, 393–410 (2015).
- 576 35. Stansbury, C. R., Ausband, D. E., Zager, P., Mack, C. M. & Waits, L. P. Identifying gray  
577 wolf packs and dispersers using noninvasive genetic samples. *J. Wildl. Manage.* **80**,  
578 1408–1419 (2016).
- 579 36. Karamanlidis, A. A. *et al.* Distribution and genetic status of brown bears in FYR  
580 Macedonia: implications for conservation. *Acta Theriol. (Warsz)*. **59**, 119–128 (2014).
- 581 37. Quinn, T. P., Wirsing, A. J., Smith, B., Cunningham, C. J. & Ching, J. Complementary  
582 use of motion-activated cameras and unbaited wire snares for DNA sampling reveals  
583 diel and seasonal activity patterns of brown bears (*Ursus arctos*) foraging on adult  
584 sockeye salmon (*Oncorhynchus nerka*). *Can. J. Zool.* **92**, 893–903 (2014).
- 585 38. Godwin, B. L., Albeke, S. E., Bergman, H. L., Walters, A. & Ben-David, M. Density of  
586 river otters (*Lontra canadensis*) in relation to energy development in the Green River  
587 Basin, Wyoming. *Sci. Total Environ.* **532**, 780–790 (2015).
- 588 39. Cohen, O., Barocas, A. & Geffen, E. Conflicting management policies for the Arabian  
589 wolf *Canis lupus arabs* in the Negev Desert: is this justified? *ORYX* **47**, 228–236  
590 (2013).
- 591 40. Anile, S., Arrabito, C., Mazzamuto, M. V., Scornavacca, D. & Ragni, B. A non-invasive  
592 monitoring on European wildcat (*Felis silvestris silvestris* Schreber, 1777) in Sicily  
593 using hair trapping and camera trapping: does scented lure work? *HYSTRIX-ITALIAN J.*  
594 *Mammal.* **23**, 44–49 (2012).
- 595 41. Steyer, K., Simon, O., Kraus, R. H. S., Haase, P. & Nowak, C. Hair trapping with  
596 valerian-treated lure sticks as a tool for genetic wildcat monitoring in low-density  
597 habitats. *Eur. J. Wildl. Res.* **59**, 39–46 (2013).
- 598 42. Yannic, G. *et al.* Genetic and morphological sex identification methods reveal a male-  
599 biased sex ratio in the Ivory Gull *Pagophila eburnea*. *J. Ornithol.* **157**, 861–873  
600 (2016).
- 601 43. Cullingham, C. I. *et al.* Population structure and dispersal of wolves in the Canadian  
602 Rocky Mountains. *J. Mammal.* **97**, 839–851 (2016).
- 603 44. Dai, Y., Lin, Q., Fang, W., Zhou, X. & Chen, X. Noninvasive and nondestructive  
604 sampling for avian microsatellite genotyping: a case study on the vulnerable Chinese  
605 Egret (*Egretta eulophotes*). *Avian Res.* **6**, 24 (2015).
- 606 45. Kolodziej, K. *et al.* Comparison of established methods for quantifying genotyping  
607 error rates in wildlife forensics. *Conserv. Genet. Resour.* **5**, 287–292 (2013).
- 608 46. Barbosa, S., Pauperio, J., Searle, J. B. & Alves, P. C. Genetic identification of Iberian

- 609 rodent species using both mitochondrial and nuclear loci: application to noninvasive  
610 sampling. *Mol. Ecol. Resour.* **13**, 43–56 (2013).
- 611 47. Malekian, M., Sadeghi, P. & Goudarzi, F. Assessment of environmental DNA for  
612 detection of an imperiled Amphibian, the luristan newt (*Neurergus kaiseri*, Schmidt  
613 1952). *Herpetol. Conserv. Biol.* **13**, 175–182 (2018).
- 614 48. Ponjoan, A. *et al.* Adverse effects of capture and handling little bustard. *J. Wildl.*  
615 *Manage.* **72**, 315–319 (2008).
- 616 49. Harcourt, R. G., Turner, E., Hall, A., Waas, J. R. & Hindell, M. Effects of capture stress  
617 on free-ranging, reproductively active male Weddell seals. *J. Comp. Physiol. A* **196**,  
618 147–154 (2010).
- 619 50. Seguel, M., Paredes, E., Pavés, H. & Gottdenker, N. L. Capture-induced stress  
620 cardiomyopathy in South American fur seal pups (*Arctophoca australis gracilis*). *Mar.*  
621 *Mammal Sci.* **30**, 1149–1157 (2014).
- 622 51. Hollenbeck, N. *et al.* Use of Swabs for Sampling Epithelial Cells for Molecular Genetics  
623 Analyses in Enterocarpus. *Am. Malacol. Bull.* **35**, 145–157 (2017).
- 624 52. Fiorito, G. *et al.* Guidelines for the care and welfare of cephalopods in research – A  
625 consensus based on an initiative by cepRes, FELASA and the Boyd Group. *Lab. Anim.*  
626 **49**, 1–90 (2015).
- 627 53. Li, J. *et al.* Applying DNA barcoding to conservation practice: a case study of  
628 endangered birds and large mammals in China. *Biodivers. Conserv.* **26**, 653–668  
629 (2017).
- 630 54. Porco, D., Rougerie, R., Deharveng, L. & Hebert, P. Coupling non-destructive DNA  
631 extraction and voucher retrieval for small soft-bodied Arthropods in a high-  
632 throughput context: the example of Collembola. *Mol. Ecol. Resour.* **10**, 942–945  
633 (2010).
- 634 55. Wisely, S. M., Maldonado, J. E. & Fleische, R. C. A technique for sampling ancient DNA  
635 that minimizes damage to museum specimens. *Conserv. Genet.* **5**, 105–107 (2004).
- 636 56. Koczur, L. M., Williford, D., DeYoung, R. W. & Ballard, B. M. Bringing back the dead:  
637 Genetic data from avian carcasses. *Wildl. Soc. Bull.* **41**, 796–803 (2017).
- 638 57. Monteiro, N. M. *et al.* Validating the use of colouration patterns for individual  
639 recognition in the worm pipefish using a novel set of microsatellite markers. *Mol.*  
640 *Ecol. Resour.* **14**, 150–156 (2014).
- 641 58. Ringler, E. Testing skin swabbing for DNA sampling in dendrobatid frogs. *Amphibia-*  
642 *Reptilia* **39**, 245–251 (2018).
- 643 59. Player, D. *et al.* An alternative minimally invasive technique for genetic sampling of  
644 bats: Wing swabs yield species identification. *Wildl. Soc. Bull.* **41**, 590–596 (2017).
- 645 60. Jones, S. P. & Kennedy, S. W. Feathers as a source of RNA for genomic studies in avian  
646 species. *Ecotoxicology* **24**, 55–60 (2015).
- 647 61. Ford, B., Govindarajulu, P., Larsen, K. & Russello, M. Evaluating the efficacy of non-  
648 invasive genetic sampling of the Northern Pacific rattlesnake with implications for  
649 other venomous squamates. *Conserv. Genet. Resour.* **9**, 13–15 (2017).
- 650 62. Barbosa, S. *et al.* Endemic species may have complex histories: within-refugium  
651 phylogeography of an endangered Iberian vole. *Mol. Ecol.* **26**, 951–967 (2017).
- 652 63. du Toit, Z., Grobler, J. P., Kotze, A., Jansen, R. & Dalton, D. L. Scale samples from  
653 Temminck’s ground pangolin (*Smutsia temminckii*): a non-invasive source of DNA.

- 654 *Conserv. Genet. Resour.* **9**, 1–4 (2017).
- 655 64. Miller-Keane & O’Toole, M. T. Encyclopedia and Dictionary of Medicine, Nursing, and  
656 Allied Health. *The Free Dictionary* (2005). doi:10.1097/00001610-199306000-00012
- 657 65. Kauffman, L. K. *et al.* Early detection of *Brucella canis* via quantitative polymerase  
658 chain reaction analysis. *Zoonoses Public Health* **61**, 48–54 (2014).
- 659 66. Reinardy, H. C., Skippins, E., Henry, T. B. & Jha, A. N. Assessment of DNA damage in  
660 sperm after repeated non-invasive sampling in zebrafish *Danio rerio*. *J. Fish Biol.* **82**,  
661 1074–1081 (2013).
- 662 67. Mccarthy, M. A. & Parris, K. M. Clarifying the effect of toe clipping on frogs with  
663 Bayesian statistics. 780–786 (2004).
- 664 68. Marschalek, D. a., Jesu, J. a. & Berres, M. E. Impact of non-lethal genetic sampling on  
665 the survival, longevity and behaviour of the Hermes copper ( *Lycaena hermes* )  
666 butterfly. *Insect Conserv. Divers.* **6**, 658–662 (2013).
- 667 69. Oi, C. A., López-Urbe, M. M., Cervini, M. & Del Lama, M. A. Non-lethal method of  
668 DNA sampling in euglossine bees supported by mark–recapture experiments and  
669 microsatellite genotyping. *J. Insect Conserv.* **17**, 1071–1079 (2013).
- 670 70. Hamm, C. A., Aggarwal, D. & Landis, D. A. Evaluating the impact of non-lethal DNA  
671 sampling on two butterflies, *Vanessa cardui* and *Satyrodes eurydice*. *J. Insect Conserv.*  
672 **14**, 11–18 (2010).
- 673 71. Vila, M., Auger-Rozenberg, M. a., Goussard, F. & Lopez-Vaamonde, C. Effect of non-  
674 lethal sampling on life-history traits of the protected moth *Graellsia isabelae*  
675 (Lepidoptera: Saturniidae). *Ecol. Entomol.* **34**, 356–362 (2009).
- 676 72. Doerr, L., Richardson, K., Ewen, J. & Armstrong, D. Effect of supplementary feeding on  
677 reproductive success of hihi (stitchbird, *Notiomystis cincta*) at a mature forest  
678 reintroduction site. *N. Z. J. Ecol.* **41**, 34–40 (2017).
- 679 73. Brekke, P., Benner, P. M., Santure, A. W. & Ewen, J. G. High genetic diversity in the  
680 remnant island population of hihi and the genetic consequences of re-introduction.  
681 *Mol. Ecol.* **20**, 29–45 (2011).
- 682 74. Bearzi, G. First report of a common dolphin (*Delphinus delphis*) death following  
683 penetration of a biopsy dart. *J. Cetacean Res. Manag.* **2**, 217–221 (2000).
- 684 75. Gemmell, N. & Majluf, P. Projectile biopsy sampling of fur seals. *Mar. Mammal Sci.*  
685 **13**, 512–516 (1997).
- 686 76. Krützen, M. & Barré, L. A biopsy system for small cetaceans: darting success and  
687 wound healing in *Tursiops* spp. *Mar. Mammal Sci.* **18**, 863–878 (2002).
- 688 77. Brown, M. W., Kraus, S. D. & D.E., G. Reaction of North Atlantic right whales  
689 (*Eubalaena glacialis*) to skin biopsy sampling for genetic and pollutant analysis. in  
690 *Report of the International Whaling Commission Special Issue* 1381–1389 (1991).  
691 doi:10022-541X-69-3-1171-Brown2
- 692 78. Barrett-Lennard, L. A cetacean biopsy system using lightweight pneumatic darts, and  
693 its effect on the behavior of killer whales. *Mar. Mammal Sci.* **12**, 14–27 (1996).
- 694 79. Gauthier, J. & Sears, R. Behavioral response of four species of balaenopterid whales  
695 to biopsy sampling. *Mar. Mammal Sci.* **15**, 85–101 (1999).
- 696 80. Parris, K. M. *et al.* Assessing ethical trade-offs in ecological field studies. *J. Appl. Ecol.*  
697 **47**, 227–234 (2010).
- 698 81. Magoun, A. J. *et al.* Integrating motion-detection cameras and hair snags for

- 699 wolverine identification. *J. Wildl. Manage.* **75**, 731–739 (2011).
- 700 82. Rovang, S., Nielsen, S. E. & Stenhouse, G. In the trap: detectability of fixed hair trap  
701 DNA methods in grizzly bear population monitoring. *Wildlife Biol.* **21**, 68–79 (2015).
- 702 83. Henry, P., Henry, A. & Russello, M. A. A noninvasive hair sampling technique to obtain  
703 high quality DNA from elusive small mammals. *J. Vis. Exp.* (2011). doi:10.3791/2791
- 704 84. Banks, S. C., Hoyle, S. D., Horsup, A., Sunnucks, P. & Taylor, A. C. Demographic  
705 monitoring of an entire species (the northern hairy-nosed wombat, *Lasiorhinus*  
706 *krefftii*) by genetic analysis of non-invasively collected material. *Anim. Conserv.* **6**,  
707 101–107 (2003).
- 708 85. Dalén, L. & Götherström, A. Recovery of DNA from footprints in the snow. *Can. Field-*  
709 *Naturalist* **121**, 321–324 (2007).
- 710 86. Nichols, R. V, Königsson, H., Danell, K. & Spong, G. Browsed twig environmental DNA:  
711 diagnostic PCR to identify ungulate species. *Mol. Ecol. Resour.* **12**, 983–9 (2012).
- 712 87. Prunier, J. *et al.* Skin swabbing as a new efficient DNA sampling technique in  
713 amphibians, and 14 new microsatellite markers in the alpine newt (*Ichthyosaura*  
714 *alpestris*). *Mol. Ecol. Resour.* **12**, 524–531 (2012).
- 715 88. Morinha, F. *et al.* DNA sampling from body swabs of terrestrial slugs (Gastropoda:  
716 Pulmonata): a simple and non-invasive method for molecular genetics approaches. *J.*  
717 *Molluscan Stud.* **80**, 99–101 (2014).
- 718 89. Uno, R. *et al.* Assessment of genotyping accuracy in a non-invasive DNA-based  
719 population survey of Asiatic black bears (*Ursus thibetanus*): lessons from a large-scale  
720 pilot study in Iwate prefecture, northern Japan. *Popul. Ecol.* **54**, 509–519 (2012).
- 721 90. Collins, R. a., Armstrong, K. F., Holyoake, A. J. & Keeling, S. Something in the water:  
722 biosecurity monitoring of ornamental fish imports using environmental DNA. *Biol.*  
723 *Invasions* **15**, 1209–1215 (2012).
- 724 91. Kowarski, K. Effects of remote biopsy sampling on long-finned pilot whales  
725 (*Globicephala melas*) in Nova Scotia. *Aquat. Mamm.* **40**, 117–125 (2014).
- 726 92. Pagano, A. M., Peacock, E. & McKinney, M. A. Remote biopsy darting and marking of  
727 polar bears. *Mar. Mammal Sci.* **30**, 169–183 (2014).
- 728 93. Boyer, S., Wratten, S. D., Holyoake, A., Abdelkrim, J. & Cruickshank, R. H. Using next-  
729 generation sequencing to analyse the diet of a highly endangered land snail  
730 (*Powelliphanta augusta*) feeding on endemic earthworms. *PLoS One* **8**, e75962  
731 (2013).
- 732 94. Lefort, M.-C. *et al.* Invasion success of a scarab beetle within its native range: host  
733 range expansion versus host-shift. *PeerJ* **2**, e262 (2014).
- 734 95. Waterhouse, B. R., Boyer, S. & Wratten, S. D. Pyrosequencing of prey DNA in faeces  
735 of carnivorous land snails to facilitate ecological restoration and relocation  
736 programmes. *Oecologia* **175**, 737–46 (2014).
- 737 96. Bateson, M. Cumulative stress in research animals: Telomere attrition as a biomarker  
738 in a welfare context? *BioEssays* **38**, 201–212 (2016).
- 739 97. Vucicevic, M. *et al.* Sex determination in 58 bird species and evaluation of CHD gene  
740 as a universal molecular marker in bird sexing. *Zoo Biol.* **32**, 269–76 (2013).
- 741 98. Hebert, P. D. N., Penton, E. H., Burns, J. M., Janzen, D. H. & Hallwachs, W. Ten species  
742 in one: DNA barcoding reveals cryptic species in the neotropical skipper butterfly  
743 *Astraptes fulgurator*. *Proc. Natl. Acad. Sci. U. S. A.* **101**, 14812–7 (2004).

- 744 99. Fumanal, B., Martin, J.-F. & Bon, M. C. High through-put characterization of insect  
745 morphocryptic entities by a non-invasive method using direct-PCR of fecal DNA. *J.*  
746 *Biotechnol.* **119**, 15–9 (2005).
- 747 100. Creel, S. Social dominance and stress hormones. *Trends Ecol. Evol.* **16**, 491–497  
748 (2001).
- 749 101. Suleman, M. & Wango, E. Physiologic manifestations of stress from capture and  
750 restraint of free-ranging male african green monkeys (*Cercopithecus aethiops*). *J. Zoo*  
751 *Wildl. Med.* **35**, 20–24 (2004).
- 752 102. Thomson, J. a. & Heithaus, M. R. Animal-borne video reveals seasonal activity  
753 patterns of green sea turtles and the importance of accounting for capture stress in  
754 short-term biologging. *J. Exp. Mar. Bio. Ecol.* **450**, 15–20 (2014).
- 755 103. Robinson, S., Waits, L. & Martin, I. Estimating abundance of American black bears  
756 using DNA-based capture-mark-recapture models. *Ursus* **20**, 1–11 (2009).
- 757 104. Nelson, G. & Graves, B. Anuran population monitoring: comparison of the north  
758 American Amphibian monitoring program’s calling index with mark-recapture  
759 estimates for *Rana clamitans*. *J. Herpetol.* **38**, 355–359 (2004).
- 760 105. Lampa, S., Henle, K., Klenke, R., Hoehn, M. & Gruber, B. How to overcome genotyping  
761 errors in non-invasive genetic mark-recapture population size estimation-A review of  
762 available methods illustrated by a case study. *J. Wildl. Manage.* **77**, 1490–1511  
763 (2013).
- 764
- 765

766

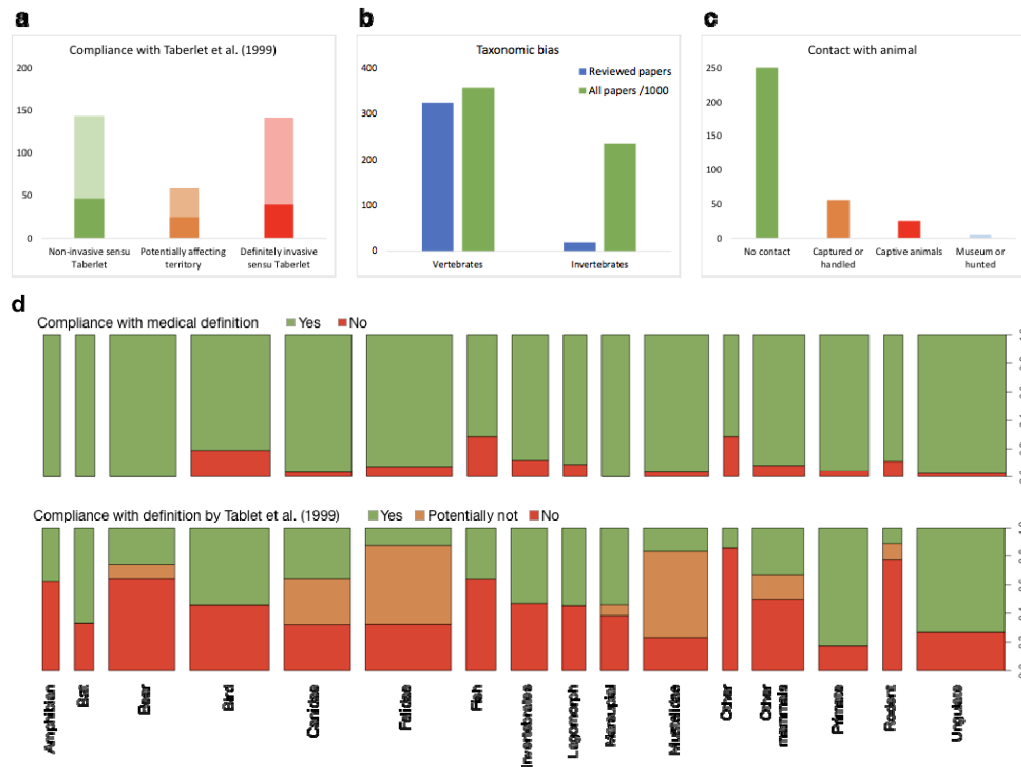

767

768 Figure 1. Summary statistics of the literature review on the use of “non-invasive DNA  
 769 sampling” between January 2013 and May 2018. For a, b, and c, y-axis is number of  
 770 papers. For d, y axis is the proportion of papers and the width of the bars represents  
 771 the number of papers for each taxonomic group.  
 772 **a:** Compliance of papers with the original definition proposed by Taberlet et al.  
 773 (1999). Dark colours correspond to papers where the phrase “non-invasive” was  
 774 present in the title, lighter colours correspond to papers where the phrase “non-  
 775 invasive” was not present in the title.  
 776 **b:** Taxonomic bias in the non-invasive DNA sampling literature. Number of papers  
 777 reviewed that focus on invertebrates or vertebrates compared to all papers on  
 778 invertebrate or vertebrate (see Method section for search command).  
 779 **c:** Number of papers complying or not complying with the no contact criteria  
 780 proposed by Taberlet et al. (1999)  
 781 **d:** Proportion of papers complying with different definitions of non-invasive sampling  
 782 in relation to the taxonomic group studied. Top: compliance with the common  
 783 definition of a non-invasive medical or veterinary procedure, (i.e. one not involving  
 784 puncture of the skin or other entry into the body (Miller-Keane Encyclopedia and  
 785 Dictionary of Medicine). Bottom: compliance with the definition of non-invasive DNA  
 786 sampling proposed by Taberlet et al. (1999). Orange boxes correspond to cases  
 787 where territory marking and social interactions may have been affected by the  
 788 removal of faecal samples.

789

790

791

792

793

**Figure 2**

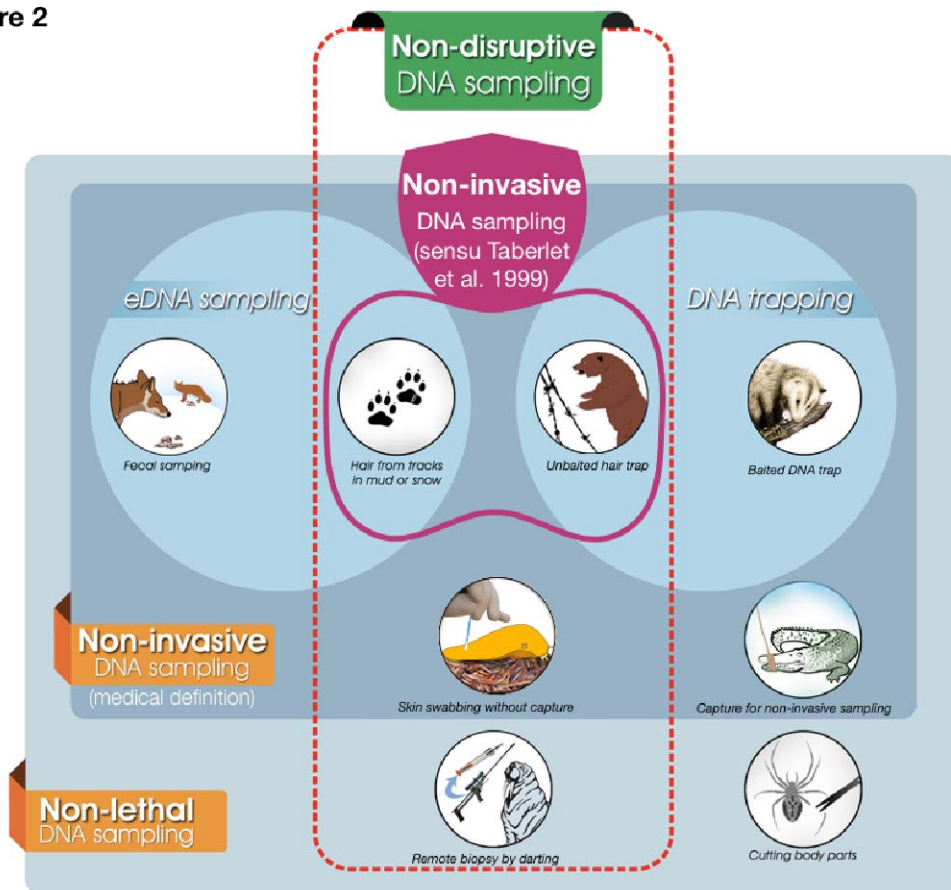

794

795 Figure 2. The relationship between non-disruptive, non-invasive and non-lethal DNA  
796 sampling methods.

797

798

799 **Table 1. Glossary of terms as used in this review.**

| <b>Term</b>                                           | <b>Definition</b>                                                                                                                                                                                      |
|-------------------------------------------------------|--------------------------------------------------------------------------------------------------------------------------------------------------------------------------------------------------------|
| <b>DNA trapping</b>                                   | Remotely obtaining DNA from one or more unknown individual organisms by taking a sample while they are present. This usually involves some sort of trap or device, which may or may not be disruptive. |
| <b>eDNA sampling</b>                                  | Obtaining trace DNA left behind by one or more unknown organisms, by sampling the environment when those organisms are no longer present at the point of sampling.                                     |
| <b>Minimally disruptive DNA sampling</b>              | Obtaining DNA with minimised effects on the animal's fitness, behaviour and welfare. To a minimised extent, such method may affect the structural/physical integrity of the organism.                  |
| <b>Minimally invasive DNA sampling</b>                | Obtaining DNA with minimised effects on the animal's structural/physical integrity. To a minimised extent, such method may affect the behaviour and welfare of the organism.                           |
| <b>Non-destructive DNA sampling</b>                   | Obtaining DNA from a known individual organism in such a way that the organism may be killed, but not destroyed, so that it can be preserved as a voucher specimen.                                    |
| <b>Non-disruptive DNA sampling</b>                    | Obtaining DNA without affecting the animal's fitness, behaviour and welfare.                                                                                                                           |
| <b>Non-invasive DNA sampling <i>sensu lato</i></b>    | Obtaining DNA without affecting the physical integrity of the animal's through puncturing the skin or other entry into the body (derived from the medical definition of a non-invasive procedure).     |
| <b>Non-invasive DNA sampling <i>sensu stricto</i></b> | Obtaining DNA that was left behind by the animal and can be collected without having to catch or disturb the animal (from Taberlet et al. 1999)                                                        |
| <b>Non-invasive procedure</b>                         | A procedure that does not involve puncture of the skin or other entry into the body (such as use of an endoscopic device).                                                                             |

800
