1 **Blood, sweat and tears: a review of non-invasive DNA sampling**

2 **M.-C. LEFORT\***, *Laboratoire d'Écologie et Biologie des Interactions (EBI) – UMR 7267 CNRS,*  
3 *Université de Poitiers, 5 rue Albert Turpain, 86073 POITIERS Cedex 9, France | Environmental*  
4 *and Animal Sciences, Unitec Institute of Technology, 139 Carrington Road, Mt*  
5 *Albert, Auckland 1025, New Zealand.*

6 **R. H. CRUICKSHANK**, *Department of Ecology, Faculty of Agricultural and Life Sciences, PO*  
7 *Box 85084, Lincoln University, Lincoln 7647, Christchurch, New Zealand.*

8 **K. DESCOVICH**, *Environmental and Animal Sciences, Unitec Institute of Technology, 139*  
9 *Carrington Road, Mt Albert, Auckland 1025, New Zealand. | Centre for Animal Welfare and*  
10 *Ethics, University of Queensland, Gatton 4343, Queensland, Australia*

11 **N. J. ADAMS**, *Environmental and Animal Sciences, Unitec Institute of Technology, 139*  
12 *Carrington Road, Mt Albert, Auckland 1025, New Zealand.*

13 **A. BARUN**, *Department of Ecology, Faculty of Agricultural and Life Sciences, PO Box 85084,*  
14 *Lincoln University, Lincoln 7647, Christchurch, New Zealand.*

15 **A. EMAMI-KHOYI**, *Centre for Ecological Genomics and Wildlife Conservation, University of*  
16 *Johannesburg, Auckland Park 2006, South Africa | Department of Ecology, Faculty of*  
17 *Agricultural and Life Sciences, PO Box 85084, Lincoln University, Lincoln 7647, Christchurch,*  
18 *New Zealand.*

19 **J. RIDDEN**, *Department of Ecology, Faculty of Agricultural and Life Sciences, PO Box 85084,*  
20 *Lincoln University, Lincoln 7647, Christchurch, New Zealand.*

21 **V. R. SMITH**, *Department of Ecology, Faculty of Agricultural and Life Sciences, PO Box 85084,*  
22 *Lincoln University, Lincoln 7647, Christchurch, New Zealand.*

23 **R. SPRAGUE**, *Bio-Protection Research Centre, PO Box 85084, Lincoln University, Lincoln 7647,*  
24 *Christchurch, New Zealand.*

25 **B. R. WATERHOUSE**, *Bio-Protection Research Centre, PO Box 85084, Lincoln University,*  
26 *Lincoln 7647, Christchurch, New Zealand.*

27 **S. BOYER\***, *Institut de Recherche sur la Biologie de l'Insecte (IRBI) – UMR 7261 CNRS /*  
28 *Université de Tours, Parc Grandmont, 37200 Tours, France*

29

30 *\*Corresponding authors: lefortmc@gmail.com and stephane.boyer@univ-tours.fr*

31

32

33 **SUMMARY**

34 The use of DNA data is ubiquitous across animal sciences. DNA may be obtained from an  
35 organism for a myriad of reasons including identification and distinction between cryptic  
36 species, sex identification, comparisons of different morphocryptic genotypes or  
37 assessments of relatedness between organisms prior to a behavioural study. DNA should be  
38 obtained while minimizing the impact on the fitness, behaviour or welfare of the subject  
39 being tested, as this can bias experimental results and cause long-lasting effects on wild  
40 animals. Furthermore, minimizing impact on experimental animals is a key Refinement  
41 principle within the “3Rs” framework which aims to ensure that animal welfare during  
42 experimentation is optimised. The term ‘non-invasive DNA sampling’ has been defined to  
43 indicate collection methods that do not require capture or cause disturbance to the animal,

44 including any effects on behaviour or fitness. In practice this is not always the case, as the  
45 term ‘non-invasive’ is commonly used in the literature to describe studies where animals are  
46 restrained or subjected to aversive procedures. We reviewed the non-invasive DNA sampling  
47 literature for the past six years (380 papers published in 2013-2018) and uncovered the  
48 existence of a significant gap between the current use of this terminology (i.e. ‘non-invasive  
49 DNA sampling’) and its original definition. We show that 58% of the reviewed papers did not  
50 comply with the original definition. We discuss the main experimental and ethical issues  
51 surrounding the potential confusion or misuse of the phrase ‘non-invasive DNA sampling’ in  
52 the current literature and provide potential solutions. In addition, we introduce the terms  
53 ‘non-disruptive’ and ‘minimally disruptive’ DNA sampling, to indicate methods that eliminate  
54 or minimise impacts not on the physical integrity/structure of the animal, but on its  
55 behaviour, fitness and welfare, which in the literature reviewed corresponds to the situation  
56 for which an accurate term is clearly missing. Furthermore, we outline when these methods  
57 are appropriate to use.

58

59

60 KEYWORDS: eDNA, animal behaviour, fitness, refinement, animal welfare

61

## 62 1. INTRODUCTION

63 DNA data are becoming increasingly important in animal biology <sup>1</sup>, both for experimental  
64 and observational studies. This is partially driven by the progressively cheaper and more  
65 user-friendly ways of accessing genomic information <sup>2</sup>. Analysis of genetic material provides  
66 data for myriad uses. In addition to analysis of phylogenetic relationships or population  
67 genetics, DNA analysis is required to determine basic information about individuals of many  
68 species <sup>3</sup>. When DNA analysis is required for purposes such as sexing, kinship and  
69 differentiation between cryptic species prior to experimentation with the same individuals,  
70 the DNA sampling procedure could bias the results of the subsequent experiment. It is  
71 therefore essential to minimise the effect that DNA sampling can have on the fitness or  
72 behaviour of the subject being tested. Furthermore, ethical use of animals in  
73 experimentation is guided by the ‘3Rs’ framework of Refinement, Replacement and  
74 Reduction (e.g. <sup>4</sup>). The impact of DNA collection is particularly relevant to the principle of  
75 Refinement where techniques with the lowest impact on the animal model should be used  
76 whenever possible. Refinement of experimentation is only possible when impact on the  
77 animal is accurately identified.

78

79 Methods of DNA collection were originally defined as ‘non-invasive’ if “*the source of the DNA*  
80 *is left behind by the animal and can be collected without having to catch or disturb the*  
81 *animal*”<sup>5,6</sup>, for example when genetic material was left behind in traces or scats (i.e. *sensu*  
82 environmental DNA (eDNA)), implicitly avoiding any impact on animal welfare.

83 These non-invasive DNA sampling procedures have been applied to study a wide range of  
84 animal taxa and answer various questions such as species identification, sexing, population  
85 genetics, description of the diet etc. To draw a comprehensive picture of the current use of  
86 these methods, we conducted a systematic review of the recent literature (2013-2018) and  
87 discuss what non-invasive DNA sampling is used for as well as issues relating to the misuse  
88 of the term.

89

## 90 **2. METHOD**

91 We conducted a keyword-based search on the Web Of Science core collection using the  
92 keywords DNA and non-invasive or DNA and noninvasive, as both spellings were originally  
93 proposed and are in common use<sup>5,6</sup>. We restricted our search to articles published in  
94 relevant disciplines and between 2013 and 2018. The search command used was the  
95 following:

96 (TS=((dna AND non-invasive) OR (dna AND noninvasive)) AND SU=(ecology OR zoology OR  
97 ornithology OR environmental sciences OR entomology OR fisheries OR behavioural science  
98 OR Biodiversity & Conservation) AND PY=(2013 OR 2015 OR 2017 OR 2014 OR 2016 OR  
99 2018))

100 Results were then refined to experimental papers written in English. On the 21st of August  
101 2019, this search yielded 429 articles. We screened these articles retaining those in which  
102 animal DNA samples were actually collected, leading to 397 articles, and removed articles  
103 with insufficient methodological information to draw conclusions about the specific  
104 questions investigated. A total of 380 papers were retained in our final dataset (see list in  
105 Supplementary Table 1). Although this dataset may not be exhaustive; it is taken to be  
106 representative of the current literature on non-invasive DNA sampling.

107 During the same time period and in the same fields as above, we estimated the total number  
108 of articles focusing on invertebrates versus vertebrates using the following commands:

- 109 • (TS=(mammal) OR TS=(vertebrate) OR TS=(bird) OR TS=(amphibian) OR TS=(reptile)  
110 OR TS=(fish) NOT (TS=(insect) OR TS=(invertebrate) OR TS=(crustacean) OR  
111 TS=(annelid) OR TS=(echinoderm) OR TS=(nemathelminth) OR TS=(arachnid) OR  
112 TS=(arthropod) OR TS=(plathelminth)) AND SU=(ecology OR zoology OR ornithology  
113 OR ecology OR environmental sciences OR entomology OR fisheries OR behavioural  
114 science OR Biodiversity & Conservation) AND PY=(2013 OR 2015 OR 2017 OR 2014  
115 OR 2016 OR 2018))
- 116 • (TS=(insect) OR TS=(invertebrate) OR TS=(crustaceans) OR TS=(annelid) OR  
117 TS=(echinoderm) OR TS=(nemathelminth) OR TS=(arachnids) OR TS=(arthropod) OR  
118 TS=(plathelminth) NOT (TS=(mammal) OR TS=(vertebrate) OR TS=(bird) OR  
119 TS=(amphibian) OR TS=(reptile) OR TS=(fish)) AND SU=(ecology OR zoology OR  
120 ornithology OR ecology OR environmental sciences OR entomology OR fisheries OR  
121 behavioural science OR Biodiversity & Conservation) AND PY=(2013 OR 2015 OR  
122 2017 OR 2014 OR 2016 OR 2018))

123 The results from these searches were used as non-exhaustive but comparable numeric  
124 estimates only, and were therefore not further curated. The abstract and the method  
125 section of each papers were carefully screened to check whether the methods used  
126 complied with the original definition proposed by Taberlet et al.<sup>6</sup> or not. A middle-ground  
127 category, labelled as “potentially affecting territory”, was created for cases where faecal  
128 samples were taken from wild animals that are known to use dejections as territory or social  
129 marking. We excluded from this category, studies that specifically mentioned only partial  
130 collection of faeces. Where multiple methods were used in the same study, these were  
131 classified as compliant with the definition by Taberlet et al. only if all the methods used were  
132 compliant or if invasive sampling methods were clearly identified from non-invasive ones.  
133 The latter required screening of the whole paper.

134 Statistical analyses were conducted with R<sup>7</sup> (version 3.6) and RStudio<sup>8</sup> (version 1.2.1335).  
135 Packages used included *stats*, *googleVis* and *bipartite*. Statistical significance was set at 5%.

136

137 **3. WHAT NON-INVASIVE DNA SAMPLING IS USED FOR**

138 Our systematic review captured 380 articles for which samples were collected from 96  
139 different countries on all continents except mainland Antarctica (Fig 1a). The number of  
140 papers detected per year was stable between 2013 and 2018 ( $\chi^2 = 4.421$ ,  $df = 5$ ,  $p$ -value =  
141 0.4877). The sampling methods used varied between 2013 and 2018 ( $\chi^2 = 39.754$ ,  $df = 25$ ,  $p$ -  
142 value = 0.03091), with in particular an increase in the use of eDNA (Fig 1b).

143 Among the studies captured in our review, 40% aimed at identifying organisms at the  
144 species level, for example to produce biodiversity inventories, or at the individual level (Fig  
145 1c). The latter was often conducted in the context of Capture Mark Recapture (CMR) studies  
146 (e.g.<sup>9</sup>), where it is essential to identify individuals. Individual genotyping was also often  
147 attempted to measure genetic diversity or for population genetic studies (e.g.<sup>10</sup>) in 15% of  
148 the reviewed articles. The development of new protocols where the quality of the DNA  
149 obtained non-invasively was the centre of interest was the aim in another 14% of the  
150 studies. Other recurrent foci were on the detection of presence (12%), the study of animals'  
151 diet (7%) or the sexing of individuals (5%).

152 The type of samples collected varied widely and 30 different categories were recorded.  
153 However, a large number of the studies focused on faecal samples collected as eDNA (48%)  
154 (Fig 1c). Another 19% of studies were based on the collection of more than one type of  
155 samples, often including faeces. Hair samples, water samples and feathers were the next  
156 most represented sample types in our dataset (10%, 6% and 3% of studies respectively). Hair  
157 samples were mainly collected through DNA trapping, while feather and water samples were  
158 generally collected using an eDNA approach. We also uncovered a variety of much more  
159 atypical sample types such as insect pupal cases, urine, fingernails, placenta, mucus etc.

160 Overall, the substantial majority of sampling methods (71%), were based on the collection of  
161 eDNA, while DNA trapping was rarely used (10%). Other cases included studies using several  
162 different methods (11%) and few very specific cases (Fig 1c). For example, invertebrates  
163 such as leeches<sup>10</sup> and carrion flies<sup>9</sup> were used to sample the DNA of the species on which  
164 they feed (Fig 1c). More surprising, a number of studies only used non-lethal (but invasive)  
165 or even lethal sampling methods (8% of the reviewed papers). Such methods are in breach  
166 of the definition of non-invasive DNA sampling as proposed by Taberlet et al.<sup>6</sup>. In fact, 58%  
167 of reviewed papers using the phrase “non-invasive” or “noninvasive” did not comply with  
168 this definition (Fig 2a) even when this phrase was present in the title of the article (59% of  
169 non-complying articles).

170

171 **4. DNA COLLECTION AND THE NON-INVASIVE MISNOMER**

172 Subsequent to its original definition, the term non-invasive has often been misapplied in the  
173 literature <sup>11</sup>. In practice, so-called ‘non-invasive’ methods have often encompassed DNA  
174 collection techniques that preserve the physical integrity of an organism but have an  
175 unmeasured, and potentially significant, impact on the fitness, behaviour or welfare of the  
176 subject being studied. For example, the following DNA collection methods were all defined  
177 as ‘non-invasive’ by the respective authors: gentle pressure applied to the thorax and  
178 abdomen of carabid beetles (*Poecilus cupreus*) to trigger regurgitation <sup>12</sup>; flushing of sage-  
179 grouse (*Centrocercus urophasianus*) from their roost sites to collect fresh faecal pellets <sup>13</sup>;  
180 and trapping, handling and cloacal swabbing of lizards (*Phrynosoma cornutum*) <sup>14</sup>.  
181 Misleading use of terminology in biology and ecology is a longstanding concern <sup>15-17</sup>. To  
182 demonstrate the extent of the issue, we conducted a systematic review of the recent  
183 literature (2013-2018) and evaluated how well papers using the term “non-invasive DNA  
184 sampling” complied with the original definition by Taberlet et al. <sup>6</sup>.

185 When the terminology for DNA sampling is misapplied as being non-invasive when it is not,  
186 readers unfamiliar with the scientific literature on DNA sampling (e.g. decision makers,  
187 conservation managers, and other end-users), may be misled in thinking that the described  
188 method can be applied without affecting the fitness nor behaviour of the target animals.  
189 Misnaming DNA sampling is also problematic for assessing impact on animals, identifying  
190 opportunities for refinement, and for judging the validity and quality of the data collected.  
191 Using more precise terminology could also help scientists realise that they may have been  
192 using invasive methods after all, and encourage them to consider reducing the impact of  
193 their sampling and/or search for truly non-invasive alternatives. The main issues exposed by  
194 our literature search are summarised in Box 1.

195

196

197

## Box 1: THE SEVEN SINS OF NON-INVASIVE DNA SAMPLING

198

### Sin 1: Taxonomic bias

199 One conspicuous result from our review was that only 18 studies (~6% of the reviewed  
200 papers) focused on invertebrates compared to 356 focusing on vertebrates (Fig 2b). This  
201 striking imbalance implies that non-invasive methods are rarely considered for sampling  
202 invertebrate DNA. When authors claimed to use non-invasive DNA sampling on  
203 invertebrates, they failed to do so in 55% of the cases (Fig 2d), and even used methods that  
204 alter the physical integrity of the organism in 10% of the cases. For example, Rorat et al.<sup>18</sup>  
205 collected individual earthworms, which they then electrified “lightly” to induce coelomic  
206 secretion. Yet, truly non-invasive methods exist for invertebrates, for example through field  
207 collection of insect exuviae<sup>19</sup>, pupal cases<sup>20</sup>, empty mummies<sup>21</sup>, dust<sup>22</sup>, soil<sup>23</sup>, or water  
208 samples<sup>24</sup>.

209 The misuse of the term non-invasive DNA sampling also varies in relation to the taxonomic  
210 group of interest within vertebrates (Fig 2d) ( $X^2 = 190.69$ ,  $df = 30$ ,  $p < 2.2e-16$ ). For example,  
211 27% of the studies on fish involved alteration of the physical integrity of the organism. These  
212 included fin clipping in eels (*Anguilla anguilla*)<sup>25</sup> and sting amputation in rays (*Aetobatus*  
213 *narinari*)<sup>26</sup> which were both considered non-invasive because these body parts can  
214 regenerate, despite the fact that fin clipping is known to be painful for fish<sup>27</sup>. In comparison,  
215 less than 4% of the studies focusing on mammals, involved biopsies.

216

217

### Sin 2: Misclassification of faeces as non-invasive DNA samples

218 The majority of the literature on non-invasive DNA sampling included the collection of faecal  
219 samples (62% of all studies reviewed here). Faecal collection is very prevalent in the field  
220 and assumed to be non-invasive by most authors. However, our analysis shows that 47% of  
221 the studies focusing solely on faecal sampling did not comply with the original definition of  
222 non-invasive DNA sampling. This included detection of animals and collection of faecal  
223 samples using aircraft (e.g.<sup>28</sup>), which may increase stress in animals (e.g.<sup>29</sup>) or cases where  
224 animals were being held in captivity (e.g.<sup>30</sup>), specifically captured to obtain faecal samples  
225 (e.g.<sup>31</sup>). For example, Jedlicka et al.<sup>32</sup> “extracted DNA from noninvasive fecal samples” of  
226 Western Bluebirds (*Sialia mexicana*) by catching adults and placing them in brown paper  
227 bags. Despite focusing on faecal samples, these procedures do not fit the definition  
228 proposed by Taberlet et al.<sup>6</sup>. The central misconception, here is that there is no such thing

229 as “non-invasive DNA samples”. Rather than the type of sample, it is the method of sampling  
230 that needs to be scrutinized for its invasiveness. Another key issue with faecal sampling is  
231 that many animals mark their territory using faeces to dissuade potential intruders (e.g. in  
232 wolf communities, see <sup>33</sup>) and also use such marks to recognise individuals from  
233 neighbouring territories, avoid unnecessary conflict and promote non-agonistic social  
234 encounters such as mating. Therefore, even when collected opportunistically after the  
235 animal has left, faecal sampling can in some cases affect the marking behaviour of territorial  
236 species (e.g. <sup>34</sup>) (Fig 2a). Such effects will likely vary with the ecology of the taxa studied but  
237 can be particularly significant for small animals when the entire scat is collected, or if  
238 undertaking repeated sampling (e.g. <sup>35</sup>). The collection of samples from territory boundaries  
239 must therefore aim to preserve territory delineation and socially relevant information.  
240 Unless the species is known to be non-territorial or marks its territory with cues other than  
241 those collected (e.g. maned wolves (*Chrysocyon brachyurus*) mark their territories with urine  
242 <sup>36</sup>), precautions should be taken to avoid impacts on marking and other social behaviours.  
243 These risks could be easily alleviated by only collecting a small portion of a faecal sample.  
244 We recorded six studies where this issue was clearly addressed either by swabbing faeces  
245 without removal <sup>37</sup> or by only collecting scat subsamples <sup>38–42</sup>.

246

### 247 **Sin 3: Baiting DNA traps**

248 In most studies using a DNA trapping strategy (90%), researchers employed bait or lures to  
249 increase the yield of their traps. Very few studies used non-lured DNA traps, for example,  
250 barb wire placed at sites used by brown bears (*Ursus arctos*) <sup>43,44</sup> or modified body snares at  
251 otter (*Lontra canadensis*) latrine sites, to collect hair <sup>45</sup>. Although it seems perfectly  
252 legitimate (and often essential) to increase the attractiveness of DNA traps with food <sup>46</sup>,  
253 scent marks from other individuals <sup>47</sup> or other attractants (e.g. Valerian essence for cats) <sup>48</sup>,  
254 the animal’s behaviour will obviously be modified as a consequence and therefore, these  
255 methods cannot be considered fully non-invasive sensu Taberlet et al. <sup>6</sup>.

256

### 257 **Sin 4: Combining invasive and non-invasive methods**

258 In a few examples the impact of the sampling strategy on animal behaviour is obvious from  
259 the article’s title itself, for example when baited traps are mentioned (e.g. <sup>48</sup>). However, in  
260 many more papers (n=35) confusion arises because authors used the phrase “non-invasive  
261 sampling” or “non-invasive DNA sampling” while a variety of sampling techniques were



262 actually applied, some of which were non-invasive and some of which were invasive sensu  
263 Taberlet et al. <sup>6</sup>. This lack of clarity about what is non-invasive and what is not can be  
264 misleading for the reader. Some authors clearly stated the invasiveness of the different  
265 methods used (e.g. <sup>49-51</sup>), however, most papers where mixed DNA sampling strategies were  
266 applied did not specify which of these methods were considered non-invasive.  
267 Another facet of this issue arises when tools (e.g. new primers, extraction protocols, DNA  
268 conservation methods) are developed specifically for analysing samples collected non-  
269 invasively but are actually tested only (or partly) on samples that were collected invasively  
270 (n=17) for example by capturing animals to perform the sampling (e.g. <sup>52,53</sup>). It is essential in  
271 such cases that authors fully acknowledge the invasiveness of the sampling method(s) they  
272 used. Often this is not clearly specified.

273

#### 274 **Sin 5: A bird in the hand is no better than two in the bush**

275 Trapping and restraint of wild animals is recognised as a significant stressor that can result in  
276 distress, injury, and death (e.g. <sup>54</sup>). Capturing and/or handling animals for DNA sampling was  
277 observed in 24% of all articles reviewed here (Fig 2c), despite the clear definition given by  
278 Taberlet et al. <sup>6</sup> that non-invasive DNA is “*collected without having to catch or disturb the*  
279 *animal*”. Indeed, capture and/or handling of individuals to obtain DNA samples (e.g. saliva  
280 swabbing) can induce long-lasting stress effects <sup>55,56</sup>, and there are very few cases where  
281 capturing an animal might have no effects on its future behaviour. Therefore, when animals  
282 must be held captive, transported or restrained in order to perform DNA sampling, the  
283 method cannot meet the definition of non-invasive DNA sampling *sensu stricto* <sup>6</sup>. Skin  
284 swabbing of octopus (*Enteroctopus dofleini*) for example <sup>57</sup>, is unlikely to be possible in the  
285 wild without disturbing the animal and the potential negative impacts on animal welfare  
286 (see <sup>58</sup> for a review on cephalopod welfare) must still be recognised.

287 Another common scenario where the animals are held during DNA sampling relates to the  
288 use of museum specimens or animals that were killed for other purposes (n=4). Whether  
289 they were legally hunted or poached and confiscated (e.g. <sup>59</sup>), this type of sampling does not  
290 qualify as non-invasive due to the disturbance and/or death of the animal through human  
291 activity. Often, a better term for such sampling is “non-destructive”, which does not damage  
292 the specimen <sup>60,61</sup> (Table 1). On the other hand, tissue sampling from animals that were  
293 found dead of natural causes is analogous to eDNA left behind by a free ranging animal and  
294 can be considered non-invasive (e.g. <sup>62</sup>). It should be noted, however, that opportunistic

295 sampling from animals already killed for other purposes (e.g. culling, museum samples) may  
296 be an ethical option because it reduces the need to otherwise target living animals and  
297 conforms to the principle of Reduction (reducing the number of affected animals) under the  
298 3Rs framework.

299

### 300 **Sin 6: All or nothing**

301 Only 42% of the reviewed studies fully met the criteria of the original definition of non-  
302 invasive DNA sampling. In most cases, however, authors tried to minimise the impact of  
303 sampling, but the nature of the definition proposed by Taberlet et al. <sup>6</sup> leaves no middle  
304 ground between invasive and non-invasive sampling methods. One potential solution to this  
305 is to use the term “minimally-invasive DNA sampling”, which can be defined as obtaining  
306 DNA with minimised effects on the animal’s structural/physical integrity, and potential  
307 impact on the behaviour and welfare of the organism (Table 1). In our dataset, this term was  
308 used in six studies to qualify skin swabbing of fish <sup>63</sup>, amphibians <sup>64</sup> and bats <sup>65</sup>, feather  
309 plucking of gulls <sup>66</sup>, cloacal swabbing in rattlesnakes <sup>67</sup> and ear biopsies in rodents <sup>68</sup>. A  
310 broader use of this term would lead to more accurate reporting, for which potential impacts  
311 of the sampling are acknowledged, while still emphasising the aspiration of the authors to  
312 minimise those impacts. The challenge associated with the use of such a term would be to  
313 define where ambiguities fall between minimally-invasive and invasive sampling methods.

314

### 315 **Sin 7: Equating a non-invasive procedure with non-invasive DNA sampling**

316 The lack of perceived stress or pain experienced by an animal is often used as a criterion to  
317 support the classification of a method as non-invasive. For example, du Toit et al. <sup>69</sup> stated  
318 that “*Pangolin scales consist of non-living keratin, therefore taking scale clippings is*  
319 *considered to be non-invasive*”. This statement relates to the common definition of a “non-  
320 invasive” medical or veterinary procedure, i.e. one that does not involve puncture of the skin  
321 or other entry into the body <sup>70</sup>. This definition (rather than the one by Taberlet et al. <sup>6</sup>)  
322 seems to be the one adopted by most authors (93% of the reviewed papers complying) (Fig  
323 2d). This was also the case for several articles at the frontier between medical/veterinary  
324 fields. Kauffman et al. <sup>71</sup> for example, called the sampling of vaginal swabs and urine from  
325 captive dogs non-invasive. Similarly, Reinardy et al. <sup>72</sup> designated as ‘non-invasive’ a  
326 procedure consisting of “*lightly anaesthetizing fish and applying a slight pressure on their*  
327 *abdomen to expel sperm*”, which was then used for DNA analysis. These examples were rare

328 in our dataset (n=3) probably because of our strict selection of articles from non-medical and  
329 non-veterinary domains (see selected fields in section 2). Nonetheless, as science becomes  
330 increasingly transdisciplinary and genetic methods developed in neighbouring fields are used  
331 in ecology, this type of confusion is likely to become more prevalent in the future. The  
332 discrepancy with the common definition of a non-invasive procedure comprises a significant  
333 limitation of the phrase non-invasive DNA sampling as defined by Taberlet et al. <sup>6</sup>, and  
334 importantly, could minimise the perceived impacts of sampling methods on animal welfare,  
335 even if these impacts are significant in reality. Although this issue was first highlighted in  
336 2006 by Garshelis who stated that: “*the term noninvasive has 2 distinct meanings, 1*  
337 *biological and 1 generic, which have become intertwined in the wildlife literature*” <sup>11</sup>, the  
338 confusion continues to riddle the current literature.

339

## 340 **5. INTRODUCING THE TERMS NON-DISRUPTIVE AND MINIMALLY DISRUPTIVE DNA** 341 **SAMPLING**

342 In order to clarify some of the existing discrepancies exposed by our literature review, we  
343 propose the introduction of the term, ‘non-disruptive DNA sampling’. This term emphasises  
344 the effects of the sampling method not on the physical integrity/structure, but on the fitness  
345 and behaviour of the organism from which the sample is obtained. We define ‘non-  
346 disruptive DNA sampling’ as obtaining DNA from an organism without affecting its fitness, or  
347 causing any behaviour or welfare impact that may last longer than the duration of the  
348 sampling (Table 1). We define ‘minimally disruptive DNA sampling’ as any sampling method  
349 that minimises impacts on fitness, behaviour and welfare. Non-disruptive DNA sampling can  
350 be differentiated from ‘non-invasive DNA sampling’ which in the current literature, largely  
351 focuses on whether the method of sampling impacts physical structures of the animal (Fig  
352 2d). The introduction of ‘non-disruptive DNA sampling’ terminology provides a functional  
353 term that appropriately focuses on the impact to the individual and not on a specific quality  
354 of the methodology (e.g. whether a physical structure is altered). We acknowledge that very  
355 few current DNA sampling methods may be entirely non-disruptive, and recommend that  
356 researchers aim at minimising disruption through protocol refinement. This could be  
357 achieved by testing the potential effects of different DNA sampling methods on survival,  
358 stress, behaviour and reproductive success as proxies for fitness. In order to make our  
359 intended meaning clear, we overlaid existing DNA sampling terms in relation to non-  
360 disruptive DNA sampling methods in the following paragraphs and in Figure 3. Rather than  
361 debating and refining existing terms, the essential point of Figure 3 is to distinguish between

362 disruptive methods, which are likely to cause lasting effects on the behaviour, welfare or  
363 fitness of an organism, and non-disruptive ones, which do not.

364

### 365 **5.1. Impact of DNA sampling on behaviour, fitness and welfare**

366 Studies examining the effect of DNA sampling on behaviour, fitness and welfare are rare and  
367 their results are not always predictable. For example, the fitness consequences of DNA  
368 sampling methods, often measured using individual survival as a proxy for fitness (e.g. <sup>73-75</sup>),  
369 depends on the taxa sampled. Responses may vary strongly between species <sup>76</sup> and even  
370 between males and females of the same species. For instance, Vila *et al.* <sup>77</sup> showed that the  
371 non-lethal but invasive DNA sampling through leg or hind wing clipping had an effect on  
372 survivorship and reproductive behaviour of adult males of the protected moth *Graellsia*  
373 *isabellae*, while mid leg clipping had a negative impact on female mating success. In  
374 particular cases, procedures to obtain DNA samples can also increase the fitness of animals.  
375 For example, supplementary feeding can have a direct positive impact on the fitness of birds  
376 <sup>78</sup>, and this may occur when animals are attracted to DNA traps baited with food or feeding  
377 cages where animals are caught for DNA sampling (e.g. <sup>79</sup>). In mammals, remote DNA  
378 sampling using biopsy darts is known to cause little reaction from marine mammals when  
379 conducted correctly and is unlikely to produce long-term deleterious effects <sup>80</sup>. Gemmell and  
380 Majluf <sup>81</sup> found that in most cases New Zealand fur seals (*Arctocephalus forsteri*) recoiled  
381 from the impact and searched briefly for the assailant, but never abandoned their territory  
382 following the darting. Another study found that bottlenose dolphins (*Tursiops spp*) reacted  
383 similarly to the darting process regardless of being hit or not, suggesting that the reaction is  
384 mainly caused by 'unexpected disturbance' rather than biopsy <sup>82</sup>. No sign of long term  
385 altered-behaviours was observed, including probability of recapture. Despite this, all biopsy  
386 sampling involves some level of risk <sup>80</sup>, and different individuals from the same species may  
387 react differently to similar stressful situations depending on gender <sup>83</sup> or individual  
388 physiological and psychological factors <sup>84,85</sup>. With regards to animal welfare, Paris *et al.* <sup>86</sup>  
389 assessed the impact of different DNA sampling methods on individual welfare in frogs. They  
390 concluded that capture and toe clipping was significantly worse than capture and buccal  
391 swabbing in terms of the level of suffering experienced by an animal, and the detrimental  
392 impacts on survival. These examples illustrate that the level of disruptiveness of DNA  
393 sampling methods should be made cautiously and studies assessing their impact on fitness,  
394 behaviour and welfare should be encouraged prior to their use.

395

396

397 **5.2. Examples of non-disruptive or minimally disruptive DNA sampling**

398 Non-disruptive DNA sampling comprises all non-invasive DNA sampling *sensu stricto* i.e.  
399 when the DNA is collected without the subjects being aware of the researcher's presence or  
400 experiencing any detrimental effects (as suggested in Taberlet & Luikart <sup>5</sup>). For example,  
401 most eDNA sampling and DNA trapping methods do not require researcher and subject to be  
402 present at the same time and place. An important point of difference between these two  
403 methods is that eDNA is often collected somewhat opportunistically, while DNA trapping  
404 allows for strategic spatial distribution of sampling.

405 Examples of DNA trapping that are non-disruptive include remote plucking or hair trapping  
406 by means of unbaited hair snag traps <sup>87,88</sup> or tape <sup>89,90</sup> placed at well-used runs.  
407 Environmental DNA sampling includes field collection of faeces (e.g. <sup>36</sup>) as long as these do  
408 not affect territory marking (see section 3.2), DNA collection from footprints in the snow,  
409 such as those from the Swedish Arctic fox (*Vulpes lagopus*) <sup>91</sup>, and from saliva on twigs, such  
410 as from ungulate browsing <sup>92</sup>. When DNA is collected in the presence of the animal, the  
411 effects of sampling can be minimised by avoiding or drastically limiting handling. For  
412 example, the swabbing of animals directly in the field with little <sup>93</sup> or no handling <sup>94</sup>.

413 Sampling methods that are non-disruptive have many benefits for conservation science,  
414 because they are unlikely to introduce bias or experimental effect or impact on animal  
415 welfare. However, they may be limited in their applicability. The main limitations associated  
416 with eDNA and DNA trapping include low DNA quantity and quality <sup>95</sup>, as well as potential  
417 contamination from non-target species <sup>96</sup>. Another limitation of DNA trapping might be the  
418 mixture of DNA from several different target individuals. In such instances, next-generation  
419 sequencing (NGS) or other post-PCR analysis (e.g. cloning, single stranded conformation  
420 polymorphism, high resolution melting, denaturing gradient gel electrophoresis) might be  
421 required to differentiate and identify the DNA of each individual.

422 A shift in focus from sampling methods that aim at avoiding breaches to physical structures  
423 of an organism, to non-disruptive or minimally disruptive methods, (avoiding impact on  
424 behaviour, fitness or welfare), means in some cases the most appropriate method may be  
425 invasive but results in a lower impact on the animal. For example, invertebrate antenna  
426 clipping in the natural environment breaches a physical structure but may result in no

427 effects on survival (e.g. <sup>75</sup>) and may have lower impacts than collecting and removing  
428 specimen to captivity for faecal sampling or forced regurgitation.

429 Similarly, remote dart biopsy or flipper notching of marine mammals are often a preferred  
430 choice over stressful captures for DNA sampling because they only cause short term effect (if  
431 any) on the behaviour of the animal <sup>97,98</sup>. Under our definitions, hair collection from the  
432 environment, unbaited DNA traps, skin swabbing in the field or remote darting on wild sea  
433 mammals could be considered non- or minimally disruptive (Fig 3).

434

## 435 **6. WHEN IS NON-DISRUPTIVE DNA REQUIRED OR PREFERRED?**

436 The selection of a DNA sampling method is usually a compromise between minimising  
437 welfare and ethical costs, and obtaining a quality DNA sample. DNA sampling methods  
438 where the specimen is in hand generally results in fresher and better-quality DNA, despite  
439 the potentially higher impact on animal behaviour or welfare. While the welfare of all  
440 experimental animals should be considered, when the subject is endangered or afforded  
441 legal protections there may be additional welfare and/or ethical issues surrounding the use  
442 of invasive DNA sampling techniques <sup>73,99</sup>. Additionally, the test subject may be required to  
443 be alive for further testing or return to their natural habitat. If further tests involve capturing  
444 an animal for a laboratory experiment <sup>100</sup> or for translocation <sup>101</sup>, then the effects of  
445 capturing and holding the organisms for DNA sampling are of less concern as individuals will  
446 need to be captured for these experiments anyway. However, stressful events can have a  
447 cumulative effect <sup>102</sup>, therefore the potential for further exacerbation of stress by DNA  
448 sampling should be carefully considered.

449 The importance of considering non-disruptive DNA sampling also depends on the type of  
450 study undertaken. Below we describe experimental studies, field behavioural studies, and  
451 capture mark recapture (CMR) research, as three types of situations in which collection and  
452 use of non-disruptive DNA samples may be essential.

453

### 454 **6.1. Laboratory-based experimentation**

455 Non-disruptive DNA sampling is necessary for species identification, sexing or genotyping of  
456 individuals prior to laboratory-based experimentation where fitness and/or behavioural  
457 traits are to be assessed. For example, many species of birds are monomorphic, and can only

458 be sexed using molecular analysis<sup>103</sup>. Similarly, many cryptic species complexes can only be  
459 elucidated genetically<sup>104</sup>. Laboratory-based behavioural or fitness studies involving cryptic  
460 or monomorphic species may therefore require DNA sexing or species identification of  
461 individuals before conducting research on them<sup>100,105</sup> to ensure a balance of sex or species  
462 across different treatments. Even when species identification is not an issue, the organisms  
463 being studied may comprise different morphocryptic genotypes<sup>105</sup> that must be determined  
464 prior to experimentation in a way that does not affect their fitness or behaviour. One  
465 classical way to alleviate the effects of sampling on behaviour (for example when animals  
466 are collected in the wild and brought to the lab), is to allow for a recovery and acclimation  
467 period.

468

## 469 **6.2. Behavioural studies in the field**

470 The second major use of non-disruptive DNA sampling is when relatedness between  
471 individual subjects must be determined prior to a behavioural study conducted in the field.  
472 For example, social interactions in mammals are often linked to kinship and can be mediated  
473 by the physiological state of individuals<sup>106</sup>. The capture and handling of animals can modify  
474 their physiology<sup>107</sup>, thereby affecting their social behaviour. Recent studies also suggest that  
475 although behaviours observed shortly after release may appear 'normal', stress levels may  
476 still be high and impact activity budgets<sup>108</sup>. Such effects may remain undetected but have  
477 significant implications for subsequent data reliability and validity.

478

## 479 **6.3. Capture Mark Recapture**

480 The effects of DNA sampling on animal behaviour may also affect the results of studies that  
481 are not directly examining behaviour or fitness. The third case when non-disruptive DNA  
482 sampling is recommended is when doing Capture Mark Recapture (CMR) studies. CMR  
483 studies using DNA tagging are often conducted to estimate population size (e.g.<sup>109</sup>), with the  
484 additional benefit of enabling population genetic analysis on the samples collected. Invasive  
485 or disruptive DNA sampling techniques may affect the survival rate of marked individuals, or  
486 introduce avoidance behaviours, which may cause trap avoidance, and the population size  
487 to be overestimated. For example, toe clipping combined with CMR is commonly used to  
488 estimate population abundance of amphibians<sup>110</sup>, but toe clipping has been shown to  
489 decrease chances of frog recapture by 4 to 11 % for each toe removed<sup>73</sup>. Similarly, sampling  
490 methods that may increase the fitness of animals (e.g. feeding cages or baited DNA traps)

491 could lead to previously sampled animals being more attracted than naïve ones <sup>11,111</sup>,  
492 thereby biasing the CMR results towards underestimating population size.

493 Such biases can be limited by the use of non-disruptive DNA sampling methods. Although  
494 eDNA has been used in CMR studies and is in most cases non-disruptive, it can have some  
495 limitations. The presence of mixed DNA samples and the lower quality of the collected DNA  
496 can lead to false positives where animals not captured previously are believed to be  
497 recaptured due to their DNA profile being indistinguishable from that of captured animals  
498 <sup>112</sup>. Because of this, non-disruptive DNA sampling may provide an appropriate balance  
499 between sample quality, data quality and impact on animals.

500

## 501 7. TAKE-HOME MESSAGES

502 1. In practice, most papers using the phrase “non-invasive DNA sampling” only comply  
503 to the medical definition of the term non-invasive, which is broader than the original  
504 definition proposed by Taberlet et al. <sup>6</sup> and is concerned only with the preservation of the  
505 physical integrity of the organism being sampled. We urge scientists using non-invasive DNA  
506 sampling methods to always state whether they refer to the definition by Taberlet et al. <sup>6</sup>  
507 *sensu stricto* or the medical definition of a non-invasive procedure (*sensu lato*).

508 2. We propose the new terms, “non-disruptive” and “minimally-disruptive” DNA  
509 sampling, to more appropriately address the potential behaviour, welfare and/or fitness  
510 effects of DNA sampling methods, as opposed to physical integrity (invasiveness in the  
511 medical sense). We can envisage situations in which the research aims are not impacted by  
512 the sampling approach to obtain DNA. However, researchers have an ethical obligation to  
513 minimise the impacts on the animals. Therefore, whenever possible, non-disruptive or  
514 minimally disruptive DNA sampling methods should be selected, in particular prior to  
515 experimental or observational studies measuring fitness or behaviour, as well as studies  
516 using techniques such as CMR where fitness or behaviour may affect results.

517 3. It may in some cases be better to use a physically invasive method (e.g. remote  
518 biopsy) that is minimally disruptive rather than a method that does not involve puncturing  
519 the skin but causes severe stress and has long-lasting effects (e.g. stressful capture for saliva  
520 swabbing).



521 4. More research is required to better understand the consequences of different live  
522 DNA sampling methods on behaviour, welfare and fitness in a variety of animal species and  
523 contexts.

524

#### 525 **ACKNOWLEDGEMENT**

526 The authors would like to thank Mehdi Mahjoob (<http://mehdimahjoob.com>), graphic  
527 designer, for his assistance with the preparation of Figure 3, the Environmental and Animal  
528 Sciences Writing Group at Unitec Institute of Technology, and particularly Rebecca Ladyman,  
529 for their valuable feedback on an earlier version of the manuscript. This review was initiated  
530 at Lincoln University (New Zealand) and we are grateful for the logistical support provided  
531 by this institution.

532

#### 533 **AUTHOR CONTRIBUTIONS**

534 Conceptualised the idea: MCL, SB, RHC ; recruited co-authors and organised literature  
535 review and writing workshops: MCL, SB ; conducted the systematic review: MCL, SB ;  
536 prepared the figures: SB ; drafted and revised the manuscript MCL, RHC, NA, AB, KD, AK, JR,  
537 VRS, RS, WB, SB. The overall author percentage contributions are as follow: MCL<sup>25</sup>, RHC<sup>10</sup>,  
538 KD<sup>8</sup>, NA<sup>5</sup>, AB<sup>5</sup>, AK<sup>5</sup>, JR<sup>5</sup>, VRS<sup>5</sup>, RS<sup>5</sup>, BW<sup>2</sup>, SB<sup>25</sup>.

539

#### 540 **DATA AVAILABILITY**

541 The list of publications reviewed and the raw data used for the analyses are available in  
542 Supplementary Table 1.

543

#### 544 **REFERENCES**

- 545 1. Suarez, R. K. & Moyes, C. D. Metabolism in the age of 'omes'. *J. Exp. Biol.* **215**, 2351–7  
546 (2012).
- 547 2. Sboner, A., Mu, X. & Greenbaum, D. The real cost of sequencing: higher than you  
548 think! *Genome Biol.* **12**, 125 (2011).
- 549 3. Hamilton, M. J. & Sadowsky, M. J. DNA Profiling in Ecology. in *Encyclopedia of Life*  
550 *Sciences* (John Wiley & Sons, Ltd, 2010). doi:10.1002/9780470015902.a0005454.pub2
- 551 4. Hollands, C. The animals (scientific procedures) Act 1986. *Lancet* **328**, 32–33 (1986).
- 552 5. Taberlet, P. & Luikart, G. Non-invasive genetic sampling and individual identification.  
553 *Biol. J. Linn. Soc.* **68**, 41–55 (1999).
- 554 6. Taberlet, P., Waits, L. P. & Luikart, G. Noninvasive genetic sampling: look before you  
555 leap. *Trends Ecol. Evol.* **14**, 323–327 (1999).
- 556 7. R Core Team. R: A language and environment for statistical computing. R Foundation  
557 for Statistical Computing. *Vienna, Austria* (2018). doi:10.1108/eb003648

- 558 8. RStudio. RStudio: Integrated development for R. [Online] RStudio, Inc., Boston, MA  
559 URL <http://www.rstudio.com> (2017). doi:10.1007/978-81-322-2340-5
- 560 9. Roy, J. *et al.* Challenges in the use of genetic mark-recapture to estimate the  
561 population size of Bwindi mountain gorillas (*Gorilla beringei beringei*). *Biol. Conserv.*  
562 **180**, 249–261 (2014).
- 563 10. Sugimoto, T. *et al.* Noninvasive genetic analyses for estimating population size and  
564 genetic diversity of the remaining Far Eastern leopard (*Panthera pardus orientalis*)  
565 population. *Conserv. Genet.* **15**, 521–532 (2014).
- 566 11. Garshelis, D. L. On the allure of noninvasive genetic sampling-putting a face to the  
567 name. *Ursus* **17**, 109–123 (2006).
- 568 12. Waldner, T. & Traugott, M. DNA-based analysis of regurgitates: a noninvasive  
569 approach to examine the diet of invertebrate consumers. *Mol. Ecol. Resour.* **12**, 669–  
570 75 (2012).
- 571 13. Baumgardt, J. A. *et al.* A method for estimating population sex ratio for sage-grouse  
572 using noninvasive genetic samples. *Mol. Ecol. Resour.* **13**, 393–402 (2013).
- 573 14. Williams, D. A. *et al.* Development of tetranucleotide microsatellite loci and a non-  
574 invasive DNA sampling method for Texas horned lizards (*Phrynosoma cornutum*).  
575 *Conserv. Genet. Resour.* **4**, 43–45 (2012).
- 576 15. Murphy, D. & Noon, B. Coping with uncertainty in wildlife biology. *J. Wildl. Manage.*  
577 **55**, 773–782 (1991).
- 578 16. Hodges, K. E. Defining the problem: terminology and progress in ecology. *Front. Ecol.*  
579 *Environ.* **6**, 35–42 (2008).
- 580 17. Herrando-Perez, S., Brook, B. W. & Bradshaw, C. J. a. Ecology needs a convention of  
581 nomenclature. *Bioscience* **64**, 311–321 (2014).
- 582 18. Rorat, A. *et al.* Coelomocyte-Derived Fluorescence and DNA Markers of Composting  
583 Earthworm Species. *J. Exp. Zool. PART A-ECOLOGICAL Genet. Physiol.* **321**, 28–40  
584 (2014).
- 585 19. Quynh, N. H., Inn, K. Y., Amaël, B. & Yikweon, J. Efficient isolation method for high-  
586 quality genomic DNA from cicada exuviae. *Ecol. Evol.* **7**, 8161–8169 (2017).
- 587 20. Richter, A. *et al.* More than an empty case: a non invasive technique for monitoring  
588 the Australian critically endangered golden sun moth, *Synemon plana* (Lepidoptera:  
589 Castniidae). *J. Insect Conserv.* **17**, 529–536 (2013).
- 590 21. Lefort, M.-C., Wratten, S., Cusumano, A., Varennes, Y.-D. & Boyer, S. Disentangling  
591 higher trophic level interactions in the cabbage aphid food web using high-  
592 throughput DNA sequencing. *Metabarcoding and Metagenomics* **1**, e13709 (2017).
- 593 22. Madden, A. A. *et al.* The diversity of arthropods in homes across the United States as  
594 determined by environmental DNA analyses. *Mol. Ecol.* **25**, 6214–6224 (2016).
- 595 23. Bienert, F. *et al.* Tracking earthworm communities from soil DNA. *Mol. Ecol.* **21**,  
596 2017–30 (2012).
- 597 24. Mächler, E., Deiner, K., Steinmann, P. & Altermatt, F. Utility of environmental DNA for  
598 monitoring rare and indicator macroinvertebrate species. *Freshw. Sci.* **33**, 1174–1183  
599 (2014).
- 600 25. Baillon, L. *et al.* Detecting the exposure to Cd and PCBs by means of a non-invasive  
601 transcriptomic approach in laboratory and wild contaminated European eels (*Anguilla*  
602 *anguilla*). *Environ. Sci. Pollut. Res.* **23**, 5431–5441 (2016).

- 603 26. Janse, M., Kappe, A. L. & Van Kuijk, B. L. M. Paternity testing using the poisonous  
604 sting in captive white-spotted eagle rays *Aetobatus narinari*: a non-invasive tool for  
605 captive sustainability programmes. *J. Fish Biol.* **82**, 1082–1085 (2013).
- 606 27. Roques, J. A. C., Abbink, W., Geurds, F., van de Vis, H. & Flik, G. Tailfin clipping, a  
607 painful procedure: Studies on Nile tilapia and common carp. *Physiol. Behav.* **101**,  
608 533–540 (2010).
- 609 28. Roffler, G. H. *et al.* Lack of sex-biased dispersal promotes fine-scale genetic structure  
610 in alpine ungulates. *Conserv. Genet.* **15**, 837–851 (2014).
- 611 29. Ditmer, M. A. *et al.* Bears show a physiological but limited behavioral response to  
612 unmanned aerial vehicles. *Curr. Biol.* **25**, 2278–2283 (2015).
- 613 30. Woodruff, S. P., Johnson, T. R. & Waits, L. P. Examining the use of fecal pellet  
614 morphometry to differentiate age classes in Sonoran pronghorn. *Wildlife Biol.* **22**,  
615 217–227 (2016).
- 616 31. Brown, V. A., Willcox, E. V., Fagan, K. E. & Bernard, R. F. Identification of southeastern  
617 bat species using noninvasive genetic sampling of individual guano pellets. *J. Fish*  
618 *Wildl. Manag.* **8**, 632–639 (2017).
- 619 32. Jedlicka, J. A., Vo, A.-T. E. & Almeida, R. P. P. Molecular scatology and high-  
620 throughput sequencing reveal predominately herbivorous insects in the diets of adult  
621 and nestling Western Bluebirds (*Sialia mexicana*) in California vineyards. *Auk* **134**,  
622 116–127 (2016).
- 623 33. Llana, L., García, E. J. & López-Bao, J. V. Intensity of territorial marking predicts wolf  
624 reproduction: implications for wolf monitoring. *PLoS One* **9**, e93015 (2014).
- 625 34. Brzeziński, M. & Romanowski, J. Experiments on sprinting activity of otters (*Lutra*  
626 *lutra*) in the Bieszczady Mountains, southeastern Poland / Observations des épreintes  
627 de la loutre (*Lutra lutra*) sur les montagnes du Bieszczady au sud-est de la Pologne.  
628 *Mammalia* **70**, 58–63 (2006).
- 629 35. Bonesi, L., Hale, M. & Macdonald, D. W. Lessons from the use of non-invasive genetic  
630 sampling as a way to estimate Eurasian otter population size and sex ratio. *Acta*  
631 *Theriol. (Warsz.)* **58**, 157–168 (2013).
- 632 36. Mannise, N., Trovati, R. G., Duarte, J. M. B., Maldonado, J. E. & González, S. Using  
633 non-invasive genetic techniques to assist in maned wolf conservation in a remnant  
634 fragment of the Brazilian Cerrado. *Anim. Biodivers. Conserv.* **41**, 315–319 (2018).
- 635 37. Klütsch, C. F. C. & Thomas, P. J. Improved genotyping and sequencing success rates  
636 for North American river otter (*Lontra canadensis*). *Eur. J. Wildl. Res.* **64**, 16 (2018).
- 637 38. Piaggio, A. J. *et al.* A noninvasive method to detect Mexican wolves and estimate  
638 abundance. *Wildl. Soc. Bull.* **40**, 321–330 (2016).
- 639 39. Stansbury, C. R. *et al.* A long-term population monitoring approach for a wide-ranging  
640 carnivore: Noninvasive genetic sampling of gray wolf rendezvous sites in Idaho, USA.  
641 *J. Wildl. Manage.* **78**, 1040–1049 (2014).
- 642 40. Wultsch, C., Waits, L. P., Hallerman, E. M. & Kelly, M. J. Optimizing collection methods  
643 for noninvasive genetic sampling of neotropical felids. *Wildl. Soc. Bull.* **39**, 403–412  
644 (2015).
- 645 41. Tsaparis, D., Karaiskou, N., Mertzanis, Y. & Triantafyllidis, A. Non-invasive genetic  
646 study and population monitoring of the brown bear (*Ursus arctos*) (Mammalia:  
647 Ursidae) in Kastoria region-Greece. *J. Nat. Hist.* **49**, 393–410 (2015).
- 648 42. Stansbury, C. R., Ausband, D. E., Zager, P., Mack, C. M. & Waits, L. P. Identifying gray

- 649 wolf packs and dispersers using noninvasive genetic samples. *J. Wildl. Manage.* **80**,  
650 1408–1419 (2016).
- 651 43. Karamanlidis, A. A. *et al.* Distribution and genetic status of brown bears in FYR  
652 Macedonia: implications for conservation. *Acta Theriol. (Warsz)*. **59**, 119–128 (2014).
- 653 44. Quinn, T. P., Wirsing, A. J., Smith, B., Cunningham, C. J. & Ching, J. Complementary  
654 use of motion-activated cameras and unbaited wire snares for DNA sampling reveals  
655 diel and seasonal activity patterns of brown bears (*Ursus arctos*) foraging on adult  
656 sockeye salmon (*Oncorhynchus nerka*). *Can. J. Zool.* **92**, 893–903 (2014).
- 657 45. Godwin, B. L., Albeke, S. E., Bergman, H. L., Walters, A. & Ben-David, M. Density of  
658 river otters (*Lontra canadensis*) in relation to energy development in the Green River  
659 Basin, Wyoming. *Sci. Total Environ.* **532**, 780–790 (2015).
- 660 46. Cohen, O., Barocas, A. & Geffen, E. Conflicting management policies for the Arabian  
661 wolf *Canis lupus arabs* in the Negev Desert: is this justified? *ORYX* **47**, 228–236  
662 (2013).
- 663 47. Anile, S., Arrabito, C., Mazzamuto, M. V., Scornavacca, D. & Ragni, B. A non-invasive  
664 monitoring on European wildcat (*Felis silvestris silvestris* Schreber, 1777) in Sicily  
665 using hair trapping and camera trapping: does scented lure work? *HYSTRIX-ITALIAN J.*  
666 *Mammal.* **23**, 44–49 (2012).
- 667 48. Steyer, K., Simon, O., Kraus, R. H. S., Haase, P. & Nowak, C. Hair trapping with  
668 valerian-treated lure sticks as a tool for genetic wildcat monitoring in low-density  
669 habitats. *Eur. J. Wildl. Res.* **59**, 39–46 (2013).
- 670 49. Yannic, G. *et al.* Genetic and morphological sex identification methods reveal a male-  
671 biased sex ratio in the Ivory Gull *Pagophila eburnea*. *J. Ornithol.* **157**, 861–873  
672 (2016).
- 673 50. Cullingham, C. I. *et al.* Population structure and dispersal of wolves in the Canadian  
674 Rocky Mountains. *J. Mammal.* **97**, 839–851 (2016).
- 675 51. Dai, Y., Lin, Q., Fang, W., Zhou, X. & Chen, X. Noninvasive and nondestructive  
676 sampling for avian microsatellite genotyping: a case study on the vulnerable Chinese  
677 Egret (*Egretta eulophotes*). *Avian Res.* **6**, 24 (2015).
- 678 52. Barbosa, S., Pauperio, J., Searle, J. B. & Alves, P. C. Genetic identification of Iberian  
679 rodent species using both mitochondrial and nuclear loci: application to noninvasive  
680 sampling. *Mol. Ecol. Resour.* **13**, 43–56 (2013).
- 681 53. Malekian, M., Sadeghi, P. & Goudarzi, F. Assessment of environmental DNA for  
682 detection of an imperiled Amphibian, the luristan newt (*Neurergus kaiseri*, Schmidt  
683 1952). *Herpetol. Conserv. Biol.* **13**, 175–182 (2018).
- 684 54. Ponjoan, A. *et al.* Adverse effects of capture and handling little bustard. *J. Wildl.*  
685 *Manage.* **72**, 315–319 (2008).
- 686 55. Harcourt, R. G., Turner, E., Hall, A., Waas, J. R. & Hindell, M. Effects of capture stress  
687 on free-ranging, reproductively active male Weddell seals. *J. Comp. Physiol. A* **196**,  
688 147–154 (2010).
- 689 56. Seguel, M., Paredes, E., Pavés, H. & Gottdenker, N. L. Capture-induced stress  
690 cardiomyopathy in South American fur seal pups (*Arctophoca australis gracilis*). *Mar.*  
691 *Mammal Sci.* **30**, 1149–1157 (2014).
- 692 57. Hollenbeck, N. *et al.* Use of Swabs for Sampling Epithelial Cells for Molecular Genetics  
693 Analyses in Enterocarpus. *Am. Malacol. Bull.* **35**, 145–157 (2017).
- 694 58. Fiorito, G. *et al.* Guidelines for the care and welfare of cephalopods in research – A

- 695 consensus based on an initiative by cepRes, FELASA and the Boyd Group. *Lab. Anim.*  
696 **49**, 1–90 (2015).
- 697 59. Li, J. *et al.* Applying DNA barcoding to conservation practice: a case study of  
698 endangered birds and large mammals in China. *Biodivers. Conserv.* **26**, 653–668  
699 (2017).
- 700 60. Porco, D., Rougerie, R., Deharveng, L. & Hebert, P. Coupling non-destructive DNA  
701 extraction and voucher retrieval for small soft-bodied Arthropods in a high-  
702 throughput context: the example of Collembola. *Mol. Ecol. Resour.* **10**, 942–945  
703 (2010).
- 704 61. Wisely, S. M., Maldonado, J. E. & Fleische, R. C. A technique for sampling ancient DNA  
705 that minimizes damage to museum specimens. *Conserv. Genet.* **5**, 105–107 (2004).
- 706 62. Koczur, L. M., Williford, D., DeYoung, R. W. & Ballard, B. M. Bringing back the dead:  
707 Genetic data from avian carcasses. *Wildl. Soc. Bull.* **41**, 796–803 (2017).
- 708 63. Monteiro, N. M. *et al.* Validating the use of colouration patterns for individual  
709 recognition in the worm pipefish using a novel set of microsatellite markers. *Mol.*  
710 *Ecol. Resour.* **14**, 150–156 (2014).
- 711 64. Ringler, E. Testing skin swabbing for DNA sampling in dendrobatid frogs. *Amphibia-*  
712 *Reptilia* **39**, 245–251 (2018).
- 713 65. Player, D. *et al.* An alternative minimally invasive technique for genetic sampling of  
714 bats: Wing swabs yield species identification. *Wildl. Soc. Bull.* **41**, 590–596 (2017).
- 715 66. Jones, S. P. & Kennedy, S. W. Feathers as a source of RNA for genomic studies in avian  
716 species. *Ecotoxicology* **24**, 55–60 (2015).
- 717 67. Ford, B., Govindarajulu, P., Larsen, K. & Russello, M. Evaluating the efficacy of non-  
718 invasive genetic sampling of the Northern Pacific rattlesnake with implications for  
719 other venomous squamates. *Conserv. Genet. Resour.* **9**, 13–15 (2017).
- 720 68. Barbosa, S. *et al.* Endemic species may have complex histories: within-refugium  
721 phylogeography of an endangered Iberian vole. *Mol. Ecol.* **26**, 951–967 (2017).
- 722 69. du Toit, Z., Grobler, J. P., Kotze, A., Jansen, R. & Dalton, D. L. Scale samples from  
723 Temminck's ground pangolin (*Smutsia temminckii*): a non-invasive source of DNA.  
724 *Conserv. Genet. Resour.* **9**, 1–4 (2017).
- 725 70. Miller-Keane & O'Toole, M. T. Encyclopedia and dictionary of medicine, nursing, and  
726 allied health. *The Free Dictionary* (2005). doi:10.1097/00001610-199306000-00012
- 727 71. Kauffman, L. K. *et al.* Early detection of *Brucella canis* via quantitative polymerase  
728 chain reaction analysis. *Zoonoses Public Health* **61**, 48–54 (2014).
- 729 72. Reinardy, H. C., Skippins, E., Henry, T. B. & Jha, A. N. Assessment of DNA damage in  
730 sperm after repeated non-invasive sampling in zebrafish *Danio rerio*. *J. Fish Biol.* **82**,  
731 1074–1081 (2013).
- 732 73. Michael, A. M. & Kirsten, M. P. Clarifying the effect of toe clipping on frogs with  
733 Bayesian statistics. *J. Appl. Ecol.* **41**, 780–786 (2004).
- 734 74. Marschalek, D. a., Jesu, J. a. & Berres, M. E. Impact of non-lethal genetic sampling on  
735 the survival, longevity and behaviour of the Hermes copper ( *Lycaena hermes* )  
736 butterfly. *Insect Conserv. Divers.* **6**, 658–662 (2013).
- 737 75. Oi, C. A., López-Urbe, M. M., Cervini, M. & Del Lama, M. A. Non-lethal method of  
738 DNA sampling in euglossine bees supported by mark–recapture experiments and  
739 microsatellite genotyping. *J. Insect Conserv.* **17**, 1071–1079 (2013).

- 740 76. Hamm, C. A., Aggarwal, D. & Landis, D. A. Evaluating the impact of non-lethal DNA  
741 sampling on two butterflies, *Vanessa cardui* and *Satyrodes eurydice*. *J. Insect Conserv.*  
742 **14**, 11–18 (2010).
- 743 77. Vila, M., Auger-Rozenberg, M. a., Goussard, F. & Lopez-Vaamonde, C. Effect of non-  
744 lethal sampling on life-history traits of the protected moth *Graellsia isabelae*  
745 (*Lepidoptera*: *Saturniidae*). *Ecol. Entomol.* **34**, 356–362 (2009).
- 746 78. Doerr, L., Richardson, K., Ewen, J. & Armstrong, D. Effect of supplementary feeding on  
747 reproductive success of hihi (stitchbird, *Notiomystis cincta*) at a mature forest  
748 reintroduction site. *N. Z. J. Ecol.* **41**, 34–40 (2017).
- 749 79. Brekke, P., Benner, P. M., Santure, A. W. & Ewen, J. G. High genetic diversity in the  
750 remnant island population of hihi and the genetic consequences of re-introduction.  
751 *Mol. Ecol.* **20**, 29–45 (2011).
- 752 80. Bearzi, G. First report of a common dolphin (*Delphinus delphis*) death following  
753 penetration of a biopsy dart. *J. Cetacean Res. Manag.* **2**, 217–221 (2000).
- 754 81. Gemmell, N. & Majluf, P. Projectile biopsy sampling of fur seals. *Mar. Mammal Sci.*  
755 **13**, 512–516 (1997).
- 756 82. Krützen, M. & Barré, L. A biopsy system for small cetaceans: darting success and  
757 wound healing in *Tursiops* spp. *Mar. Mammal Sci.* **18**, 863–878 (2002).
- 758 83. Brown, M. W., Kraus, S. D. & D.E., G. Reaction of North Atlantic right whales  
759 (*Eubalaena glacialis*) to skin biopsy sampling for genetic and pollutant analysis. in  
760 *Report of the International Whaling Commission Special Issue 1381–1389* (1991).  
761 doi:i0022-541X-69-3-1171-Brown2
- 762 84. Barrett-Lennard, L. A cetacean biopsy system using lightweight pneumatic darts, and  
763 its effect on the behavior of killer whales. *Mar. Mammal Sci.* **12**, 14–27 (1996).
- 764 85. Gauthier, J. & Sears, R. Behavioral response of four species of balaenopterid whales  
765 to biopsy sampling. *Mar. Mammal Sci.* **15**, 85–101 (1999).
- 766 86. Parris, K. M. *et al.* Assessing ethical trade-offs in ecological field studies. *J. Appl. Ecol.*  
767 **47**, 227–234 (2010).
- 768 87. Magoun, A. J. *et al.* Integrating motion-detection cameras and hair snags for  
769 wolverine identification. *J. Wildl. Manage.* **75**, 731–739 (2011).
- 770 88. Rovang, S., Nielsen, S. E. & Stenhouse, G. In the trap: detectability of fixed hair trap  
771 DNA methods in grizzly bear population monitoring. *Wildlife Biol.* **21**, 68–79 (2015).
- 772 89. Henry, P., Henry, A. & Russello, M. A. A noninvasive hair sampling technique to obtain  
773 high quality DNA from elusive small mammals. *J. Vis. Exp.* (2011). doi:10.3791/2791
- 774 90. Banks, S. C., Hoyle, S. D., Horsup, A., Sunnucks, P. & Taylor, A. C. Demographic  
775 monitoring of an entire species (the northern hairy-nosed wombat, *Lasiorhinus*  
776 *krefftii*) by genetic analysis of non-invasively collected material. *Anim. Conserv.* **6**,  
777 101–107 (2003).
- 778 91. Dalén, L. & Götherström, A. Recovery of DNA from footprints in the snow. *Can. Field-  
779 Naturalist* **121**, 321–324 (2007).
- 780 92. Nichols, R. V., Königsson, H., Danell, K. & Spong, G. Browsed twig environmental DNA:  
781 diagnostic PCR to identify ungulate species. *Mol. Ecol. Resour.* **12**, 983–9 (2012).
- 782 93. Prunier, J. *et al.* Skin swabbing as a new efficient DNA sampling technique in  
783 amphibians, and 14 new microsatellite markers in the alpine newt (*Ichthyosaura*  
784 *alpestris*). *Mol. Ecol. Resour.* **12**, 524–531 (2012).

- 785 94. Morinha, F. *et al.* DNA sampling from body swabs of terrestrial slugs (Gastropoda:  
786 Pulmonata): a simple and non-invasive method for molecular genetics approaches. *J.*  
787 *Molluscan Stud.* **80**, 99–101 (2014).
- 788 95. Uno, R. *et al.* Assessment of genotyping accuracy in a non-invasive DNA-based  
789 population survey of Asiatic black bears (*Ursus thibetanus*): lessons from a large-scale  
790 pilot study in Iwate prefecture, northern Japan. *Popul. Ecol.* **54**, 509–519 (2012).
- 791 96. Collins, R. a., Armstrong, K. F., Holyoake, A. J. & Keeling, S. Something in the water:  
792 biosecurity monitoring of ornamental fish imports using environmental DNA. *Biol.*  
793 *Invasions* **15**, 1209–1215 (2012).
- 794 97. Kowarski, K. Effects of remote biopsy sampling on long-finned pilot whales  
795 (*Globicephala melas*) in Nova Scotia. *Aquat. Mamm.* **40**, 117–125 (2014).
- 796 98. Pagano, A. M., Peacock, E. & McKinney, M. A. Remote biopsy darting and marking of  
797 polar bears. *Mar. Mammal Sci.* **30**, 169–183 (2014).
- 798 99. Boyer, S., Wratten, S. D., Holyoake, A., Abdelkrim, J. & Cruickshank, R. H. Using next-  
799 generation sequencing to analyse the diet of a highly endangered land snail  
800 (*Powelliphanta augusta*) feeding on endemic earthworms. *PLoS One* **8**, e75962  
801 (2013).
- 802 100. Lefort, M.-C. *et al.* Invasion success of a scarab beetle within its native range: host  
803 range expansion versus host-shift. *PeerJ* **2**, e262 (2014).
- 804 101. Waterhouse, B. R., Boyer, S. & Wratten, S. D. Pyrosequencing of prey DNA in faeces  
805 of carnivorous land snails to facilitate ecological restoration and relocation  
806 programmes. *Oecologia* **175**, 737–46 (2014).
- 807 102. Bateson, M. Cumulative stress in research animals: Telomere attrition as a biomarker  
808 in a welfare context? *BioEssays* **38**, 201–212 (2016).
- 809 103. Vucicevic, M. *et al.* Sex determination in 58 bird species and evaluation of CHD gene  
810 as a universal molecular marker in bird sexing. *Zoo Biol.* **32**, 269–76 (2013).
- 811 104. Hebert, P. D. N., Penton, E. H., Burns, J. M., Janzen, D. H. & Hallwachs, W. Ten species  
812 in one: DNA barcoding reveals cryptic species in the neotropical skipper butterfly  
813 *Astraptes fulgerator*. *Proc. Natl. Acad. Sci. U. S. A.* **101**, 14812–7 (2004).
- 814 105. Fumanal, B., Martin, J.-F. & Bon, M. C. High through-put characterization of insect  
815 morphocryptic entities by a non-invasive method using direct-PCR of fecal DNA. *J.*  
816 *Biotechnol.* **119**, 15–9 (2005).
- 817 106. Creel, S. Social dominance and stress hormones. *Trends Ecol. Evol.* **16**, 491–497  
818 (2001).
- 819 107. Suleman, M. & Wango, E. Physiologic manifestations of stress from capture and  
820 restraint of free-ranging male African green monkeys (*Cercopithecus aethiops*). *J. Zoo*  
821 *Wildl. Med.* **35**, 20–24 (2004).
- 822 108. Thomson, J. a. & Heithaus, M. R. Animal-borne video reveals seasonal activity  
823 patterns of green sea turtles and the importance of accounting for capture stress in  
824 short-term biologging. *J. Exp. Mar. Bio. Ecol.* **450**, 15–20 (2014).
- 825 109. Robinson, S., Waits, L. & Martin, I. Estimating abundance of American black bears  
826 using DNA-based capture-mark-recapture models. *Ursus* **20**, 1–11 (2009).
- 827 110. Nelson, G. & Graves, B. Anuran population monitoring: comparison of the north  
828 American Amphibian monitoring program’s calling index with mark-recapture  
829 estimates for *Rana clamitans*. *J. Herpetol.* **38**, 355–359 (2004).

- 830 111. Boulanger, J., Stenhouse, G. & Munro, R. Sources of heterogeneity bias when DNA  
831 mark-recapture sampling methods are applied to grizzly bear (*Ursus arctos*)  
832 populations. *J. Mammal.* **85**, 618–624 (2004).
- 833 112. Lampa, S., Henle, K., Klenke, R., Hoehn, M. & Gruber, B. How to overcome genotyping  
834 errors in non-invasive genetic mark-recapture population size estimation-A review of  
835 available methods illustrated by a case study. *J. Wildl. Manage.* **77**, 1490–1511  
836 (2013).
- 837 113. Modave, E., MacDonald, A. J. & Sarre, S. D. A single mini-barcode test to screen for  
838 Australian mammalian predators from environmental samples. *Gigascience* **6**, 1–13  
839 (2017).
- 840 114. Duenas, J. F., Cruickshank, R. & Ross, J. Optimisation of a microsatellite panel for the  
841 individual identification of brushtail possums using low template DNA. *N. Z. J. Ecol.*  
842 **39**, 93–102 (2015).
- 843 115. Huang, H., Wang, H., Li, L., Wu, Z. & Chen, J. Genetic diversity and population  
844 demography of the Chinese crocodile lizard (*Shinisaurus crocodilurus*) in China. *PLoS*  
845 *One* **9**, (2014).
- 846 116. Proffitt, K. M. *et al.* Integrating resource selection into spatial capture-recapture  
847 models for large carnivores. *ECOSPHERE* **6**, (2015).
- 848 117. López, H., Contreras-Díaz, H. G., Oromí, P. & Juan, C. Delimiting species boundaries  
849 for endangered Canary Island grasshoppers based on DNA sequence data. *Conserv.*  
850 *Genet.* **8**, 587–598 (2007).
- 851



852

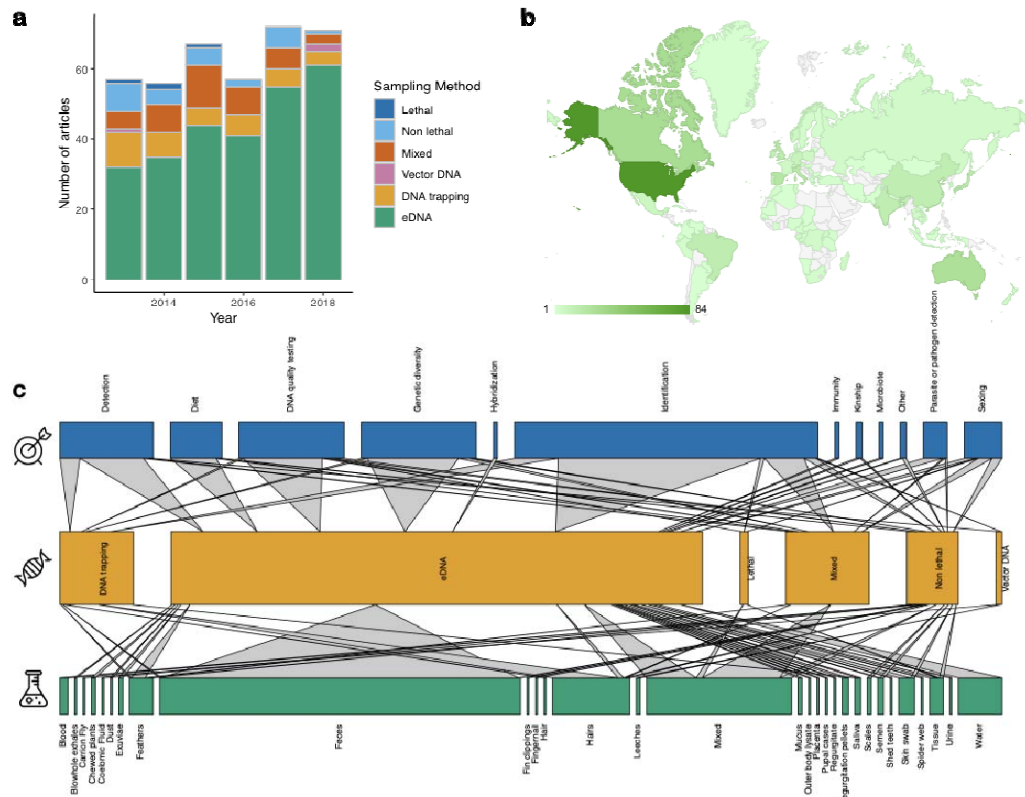

853

854 Figure 1. Summary statistics of the literature review on the use of “non-invasive DNA  
855 sampling” between January 2013 and December 2018 (n=380).

856 **a:** Number of articles in relation to the sampling method used between 2013 and  
857 2018..

858 **b:** Countries of origin of the samples analysed in the reviewed papers. Countries in  
859 grey were not represented in our review, countries coloured in various shades of  
860 green provided samples for 1 to 84 of the reviewed papers (see in-graph legend for  
861 colour scale).

862 **c:** Bipartite network of the main aim of the studies in blue, the type of sampling  
863 method used in orange (see Table 1 for definitions) and the nature of the samples  
864 collected in green. The horizontal width of the rectangles is proportional to the  
865 number of articles in each category.

866

867

868

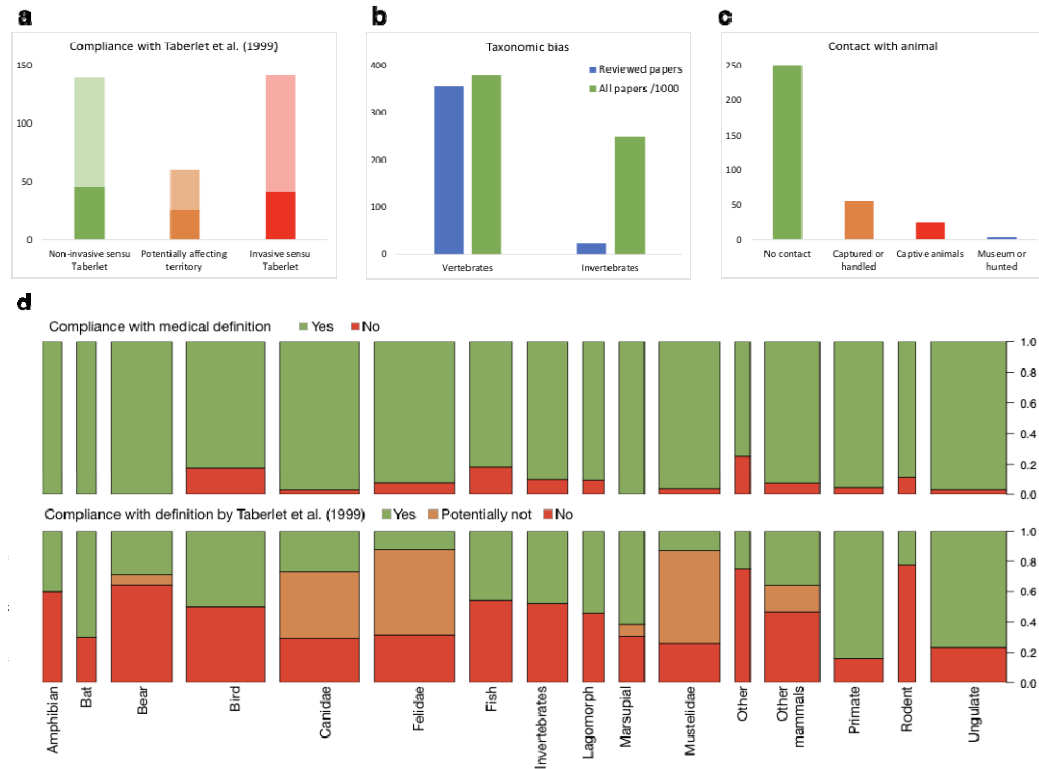

869

870

871 Figure 2. Summary statistics of the main issues exposed by our literature review on the use  
872 of “non-invasive DNA sampling” between January 2013 and December 2018 (n=380).

873 For a, b, and c, the y-axis is number of papers. For d, the y-axis is the proportion of  
874 papers and the width of the bars is proportional to the number of papers for each  
875 taxonomic group.

876 **a:** Compliance of papers with the original definition proposed by Taberlet et al. <sup>(6)</sup>.  
877 Studies where multiple methods were used (n=31) were classified as compliant with  
878 the definition by Taberlet et al. only if all the methods used were compliant OR if  
879 invasive sampling methods were clearly identified by the authors. Dark colours  
880 correspond to papers where the phrase “non-invasive” was present in the title,  
881 lighter colours correspond to papers where the phrase “non-invasive” was not  
882 present in the title. The orange bar (labelled as “potentially affecting territory”,  
883 corresponds to cases where territory marking and social interactions may have been  
884 affected by the removal of faecal samples.

885 **b:** Taxonomic bias in the non-invasive DNA sampling literature. Number of papers  
886 reviewed that focus on invertebrates or vertebrates compared to all papers on  
887 invertebrate or vertebrate (see Method section for search command).

888            **c:** Number of papers complying (in green) or not complying with the no contact  
889            criteria proposed by Taberlet et al. (<sup>6</sup>), because animals were either captured or  
890            handled for DNA sampling (orange), held in captivity (red) or had been killed (blue).  
891            **d:** Proportion of papers complying with different definitions of non-invasive sampling  
892            in relation to the taxonomic group studied. Top: compliance with the common  
893            definition of a non-invasive medical or veterinary procedure, (i.e. one not involving  
894            puncture of the skin or other entry into the body (<sup>70</sup>). Bottom: compliance with the  
895            definition of non-invasive DNA sampling proposed by Taberlet et al. (<sup>6</sup>). Orange boxes  
896            (labelled as “Potentially Not”) correspond to cases where territory marking and social  
897            interactions may have been affected by the removal of faecal samples.

898

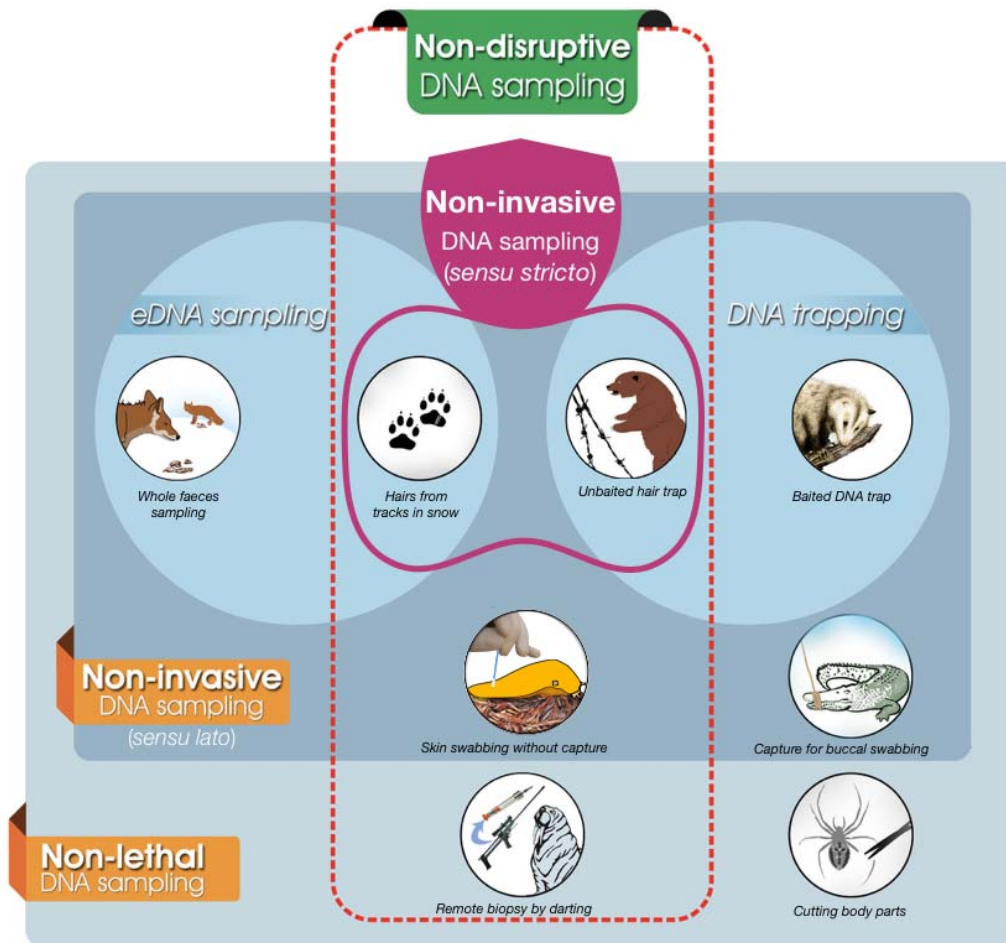

899

900 Figure 3. The relationship between non-disruptive, non-invasive and non-lethal DNA  
901 sampling methods. Non-invasive DNA sampling *sensu stricto* corresponds to the definition  
902 given by Taberlet et al. (6), Non-invasive DNA sampling *sensu lato* corresponds to the medical  
903 definition (70). Pictograms represent a non-exhaustive list of examples for which references  
904 are given below. From left to right and top to bottom: whole faeces sampling for species  
905 that use faecal territory marking (113), hairs collected in snow (50), hairs collected with  
906 unbaited barbed wire(43), DNA trap baited to attract animals (114), skin swabbing in the field  
907 without capture (94), capture of reptiles for buccal swabbing (115), gun darting of big  
908 mammals to collect tissue sample(116), biopsy on handled invertebrate (117).

909

910 **Table 1. Glossary of terms as used in this review.**

| <b>Term</b>                                           | <b>Definition</b>                                                                                                                                                                                      |
|-------------------------------------------------------|--------------------------------------------------------------------------------------------------------------------------------------------------------------------------------------------------------|
| <b>DNA trapping</b>                                   | Remotely obtaining DNA from one or more unknown individual organisms by taking a sample while they are present. This usually involves some sort of trap or device, which may or may not be disruptive. |
| <b>eDNA sampling</b>                                  | Obtaining trace DNA left behind by one or more unknown organisms, by sampling the environment when those organisms are no longer present at the point of sampling.                                     |
| <b>Minimally disruptive DNA sampling</b>              | Obtaining DNA with minimised effects on the animal's fitness, behaviour and welfare. To a minimised extent, such method may affect the structural/physical integrity of the organism.                  |
| <b>Minimally invasive DNA sampling</b>                | Obtaining DNA with minimised effects on the animal's structural/physical integrity. To a minimised extent, such method may affect the behaviour and welfare of the organism.                           |
| <b>Non-destructive DNA sampling</b>                   | Obtaining DNA from a known individual organism in such a way that the organism may be killed, but not destroyed, so that it can be preserved as a voucher specimen.                                    |
| <b>Non-disruptive DNA sampling</b>                    | Obtaining DNA without affecting the animal's fitness, behaviour and welfare.                                                                                                                           |
| <b>Non-invasive DNA sampling <i>sensu lato</i></b>    | Obtaining DNA without affecting the physical integrity of the animal's through puncturing the skin or other entry into the body (derived from the medical definition of a non-invasive procedure).     |
| <b>Non-invasive DNA sampling <i>sensu stricto</i></b> | Obtaining DNA that was left behind by the animal and can be collected without having to catch or disturb the animal (from Taberlet et al. 1999)                                                        |
| <b>Non-invasive procedure</b>                         | A procedure that does not involve puncture of the skin or other entry into the body (such as use of an endoscopic device).                                                                             |
| <b>Non-lethal DNA sampling</b>                        | Obtaining DNA from an organism in such a way that the organism is not killed. This broad category includes invasive and non-invasive methods.                                                          |

911

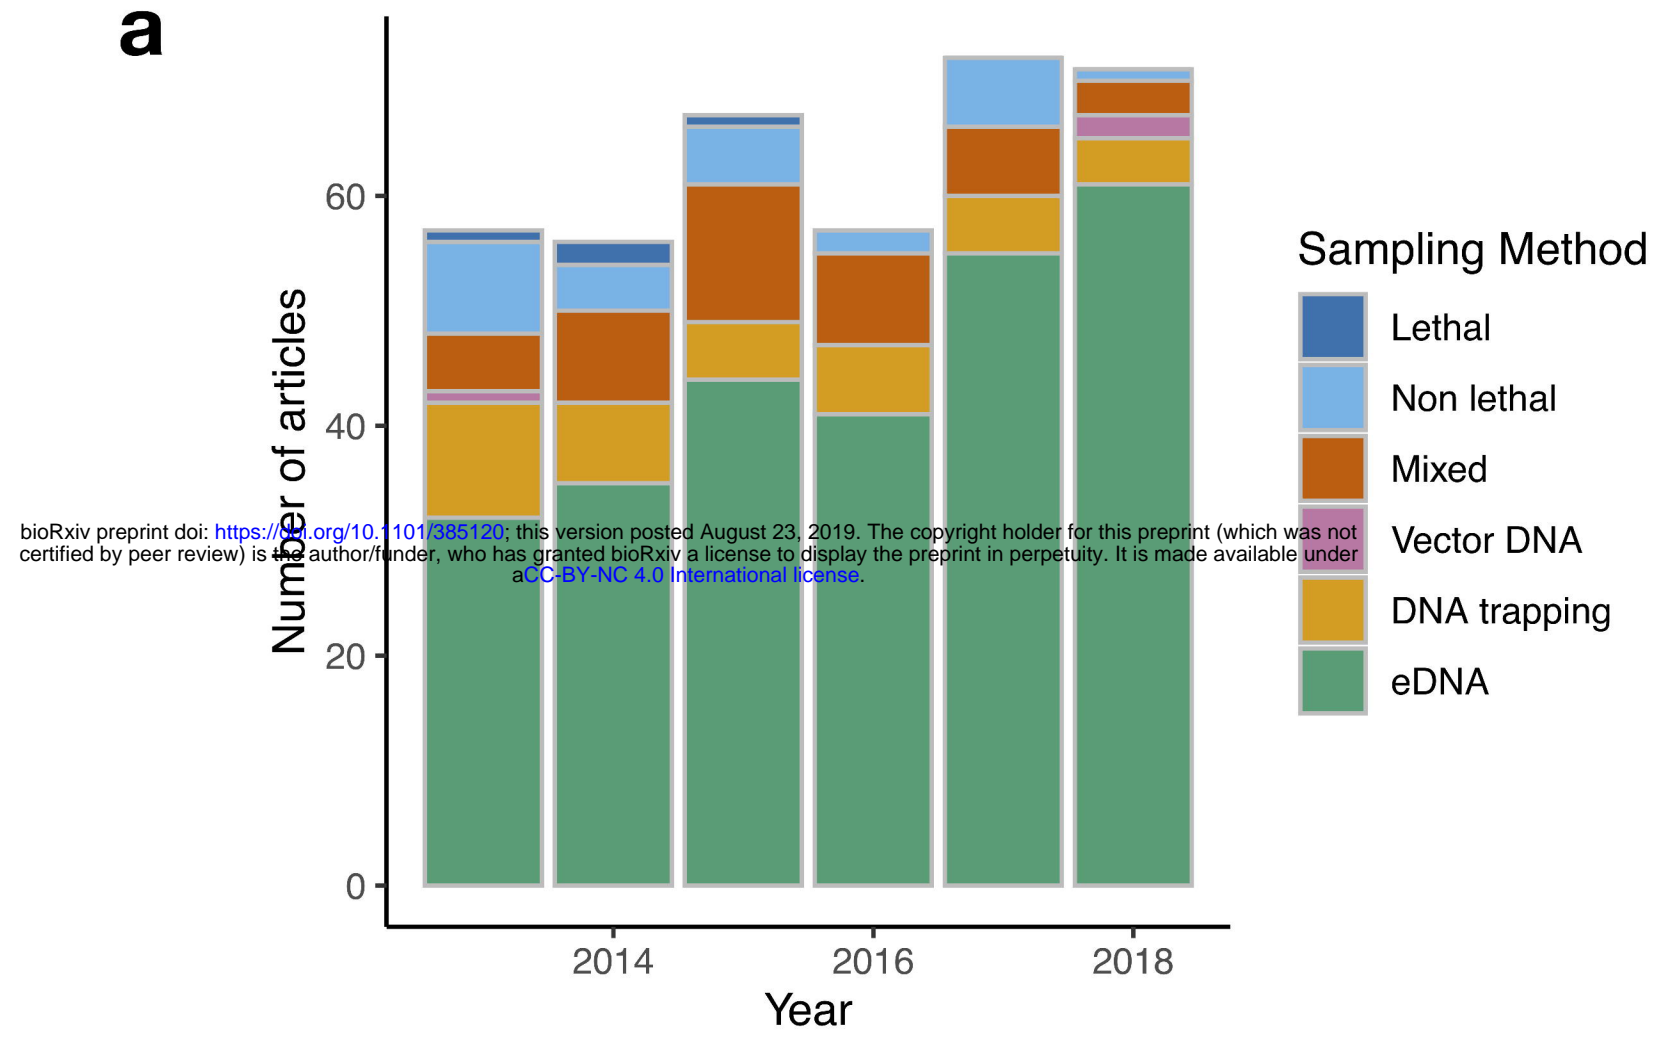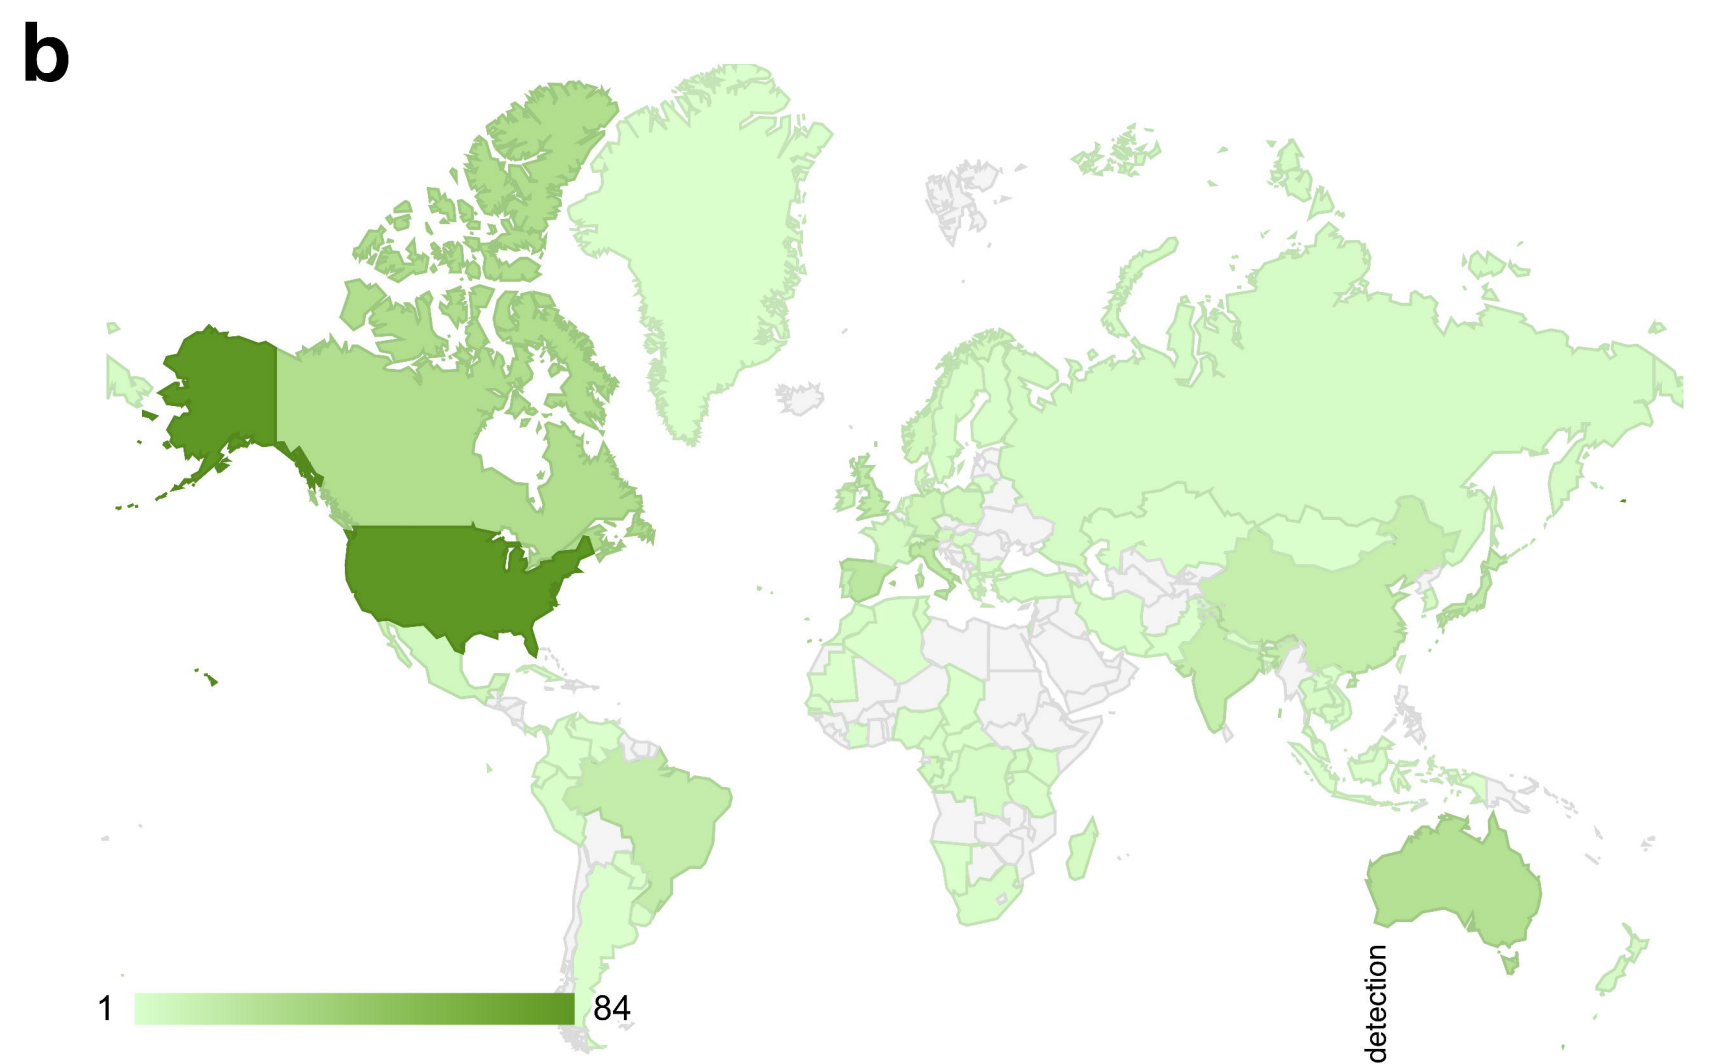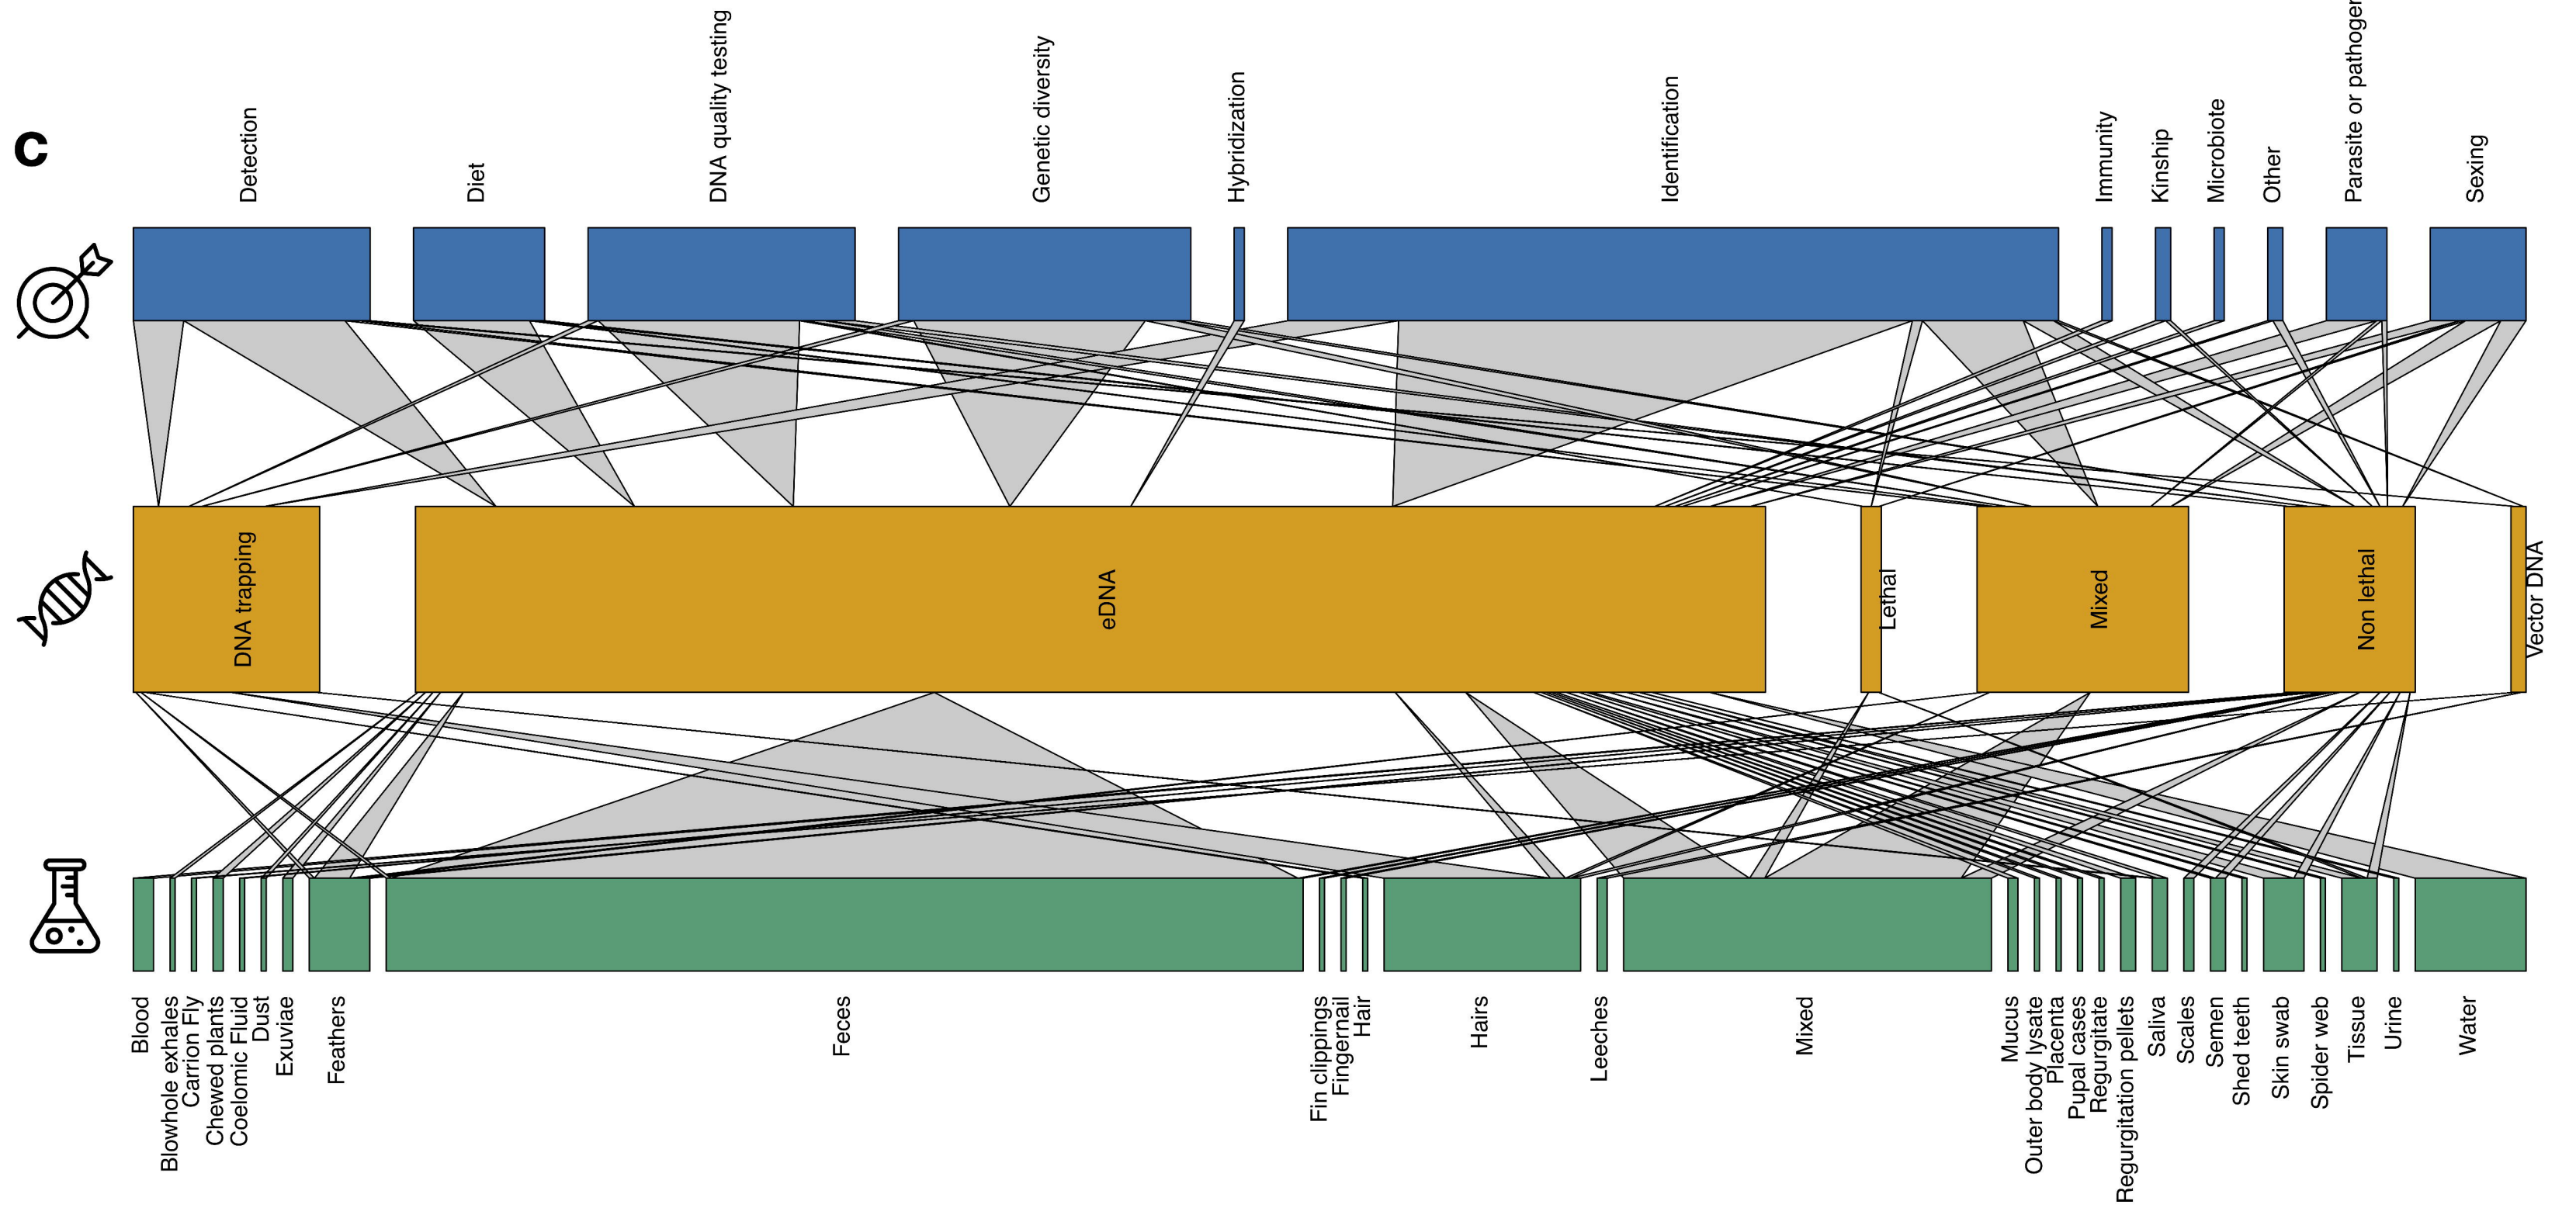

**a**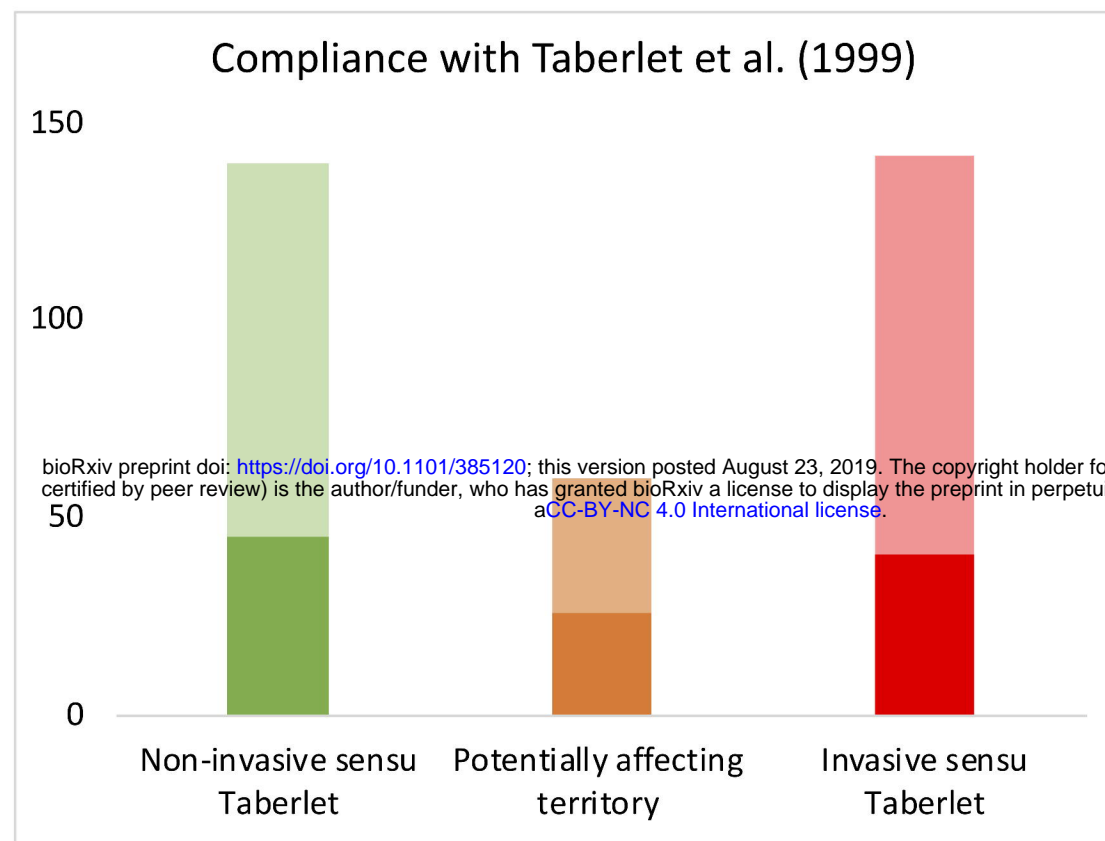**b**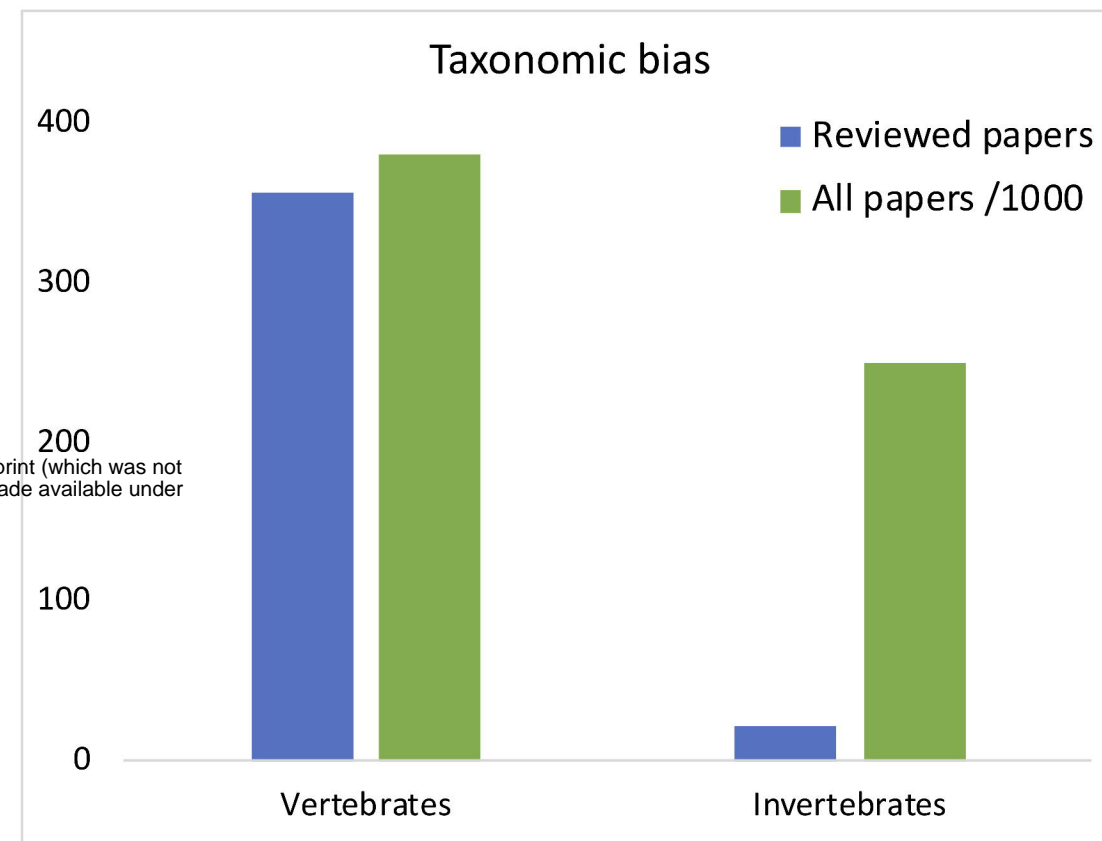**c**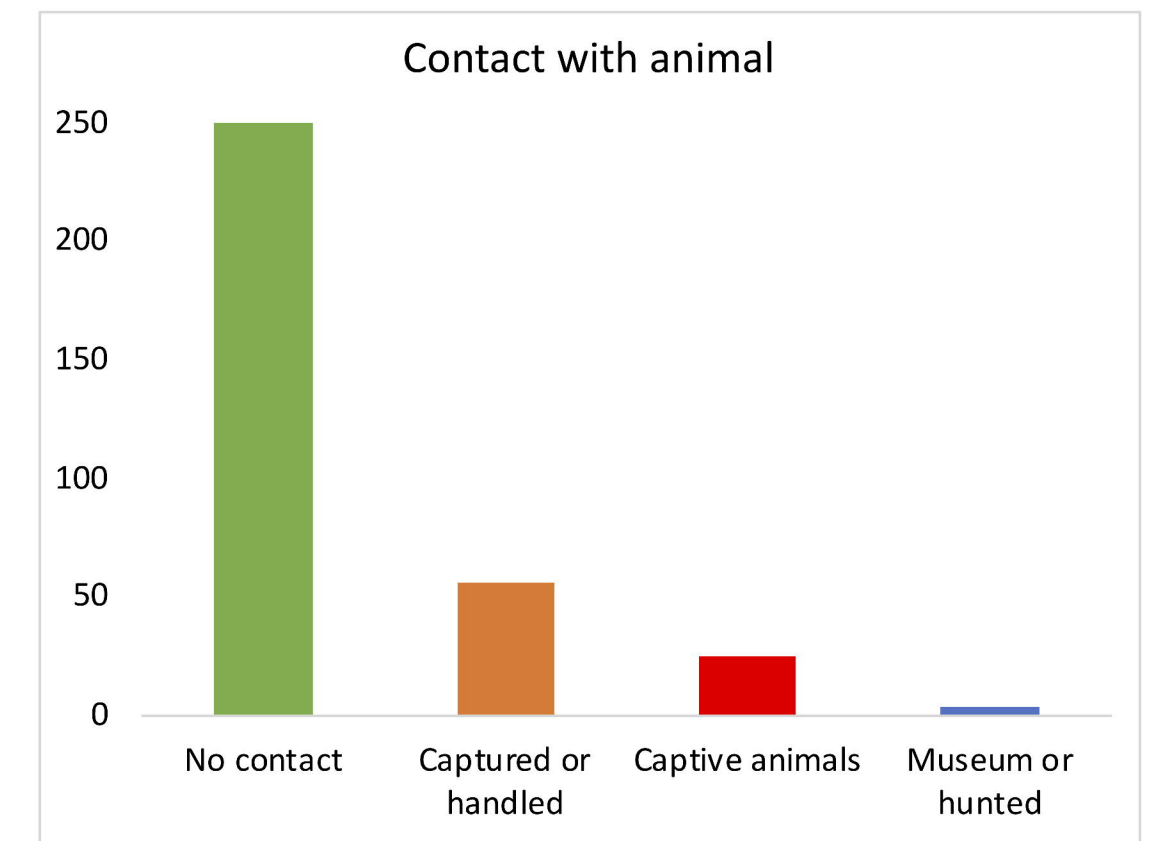**d**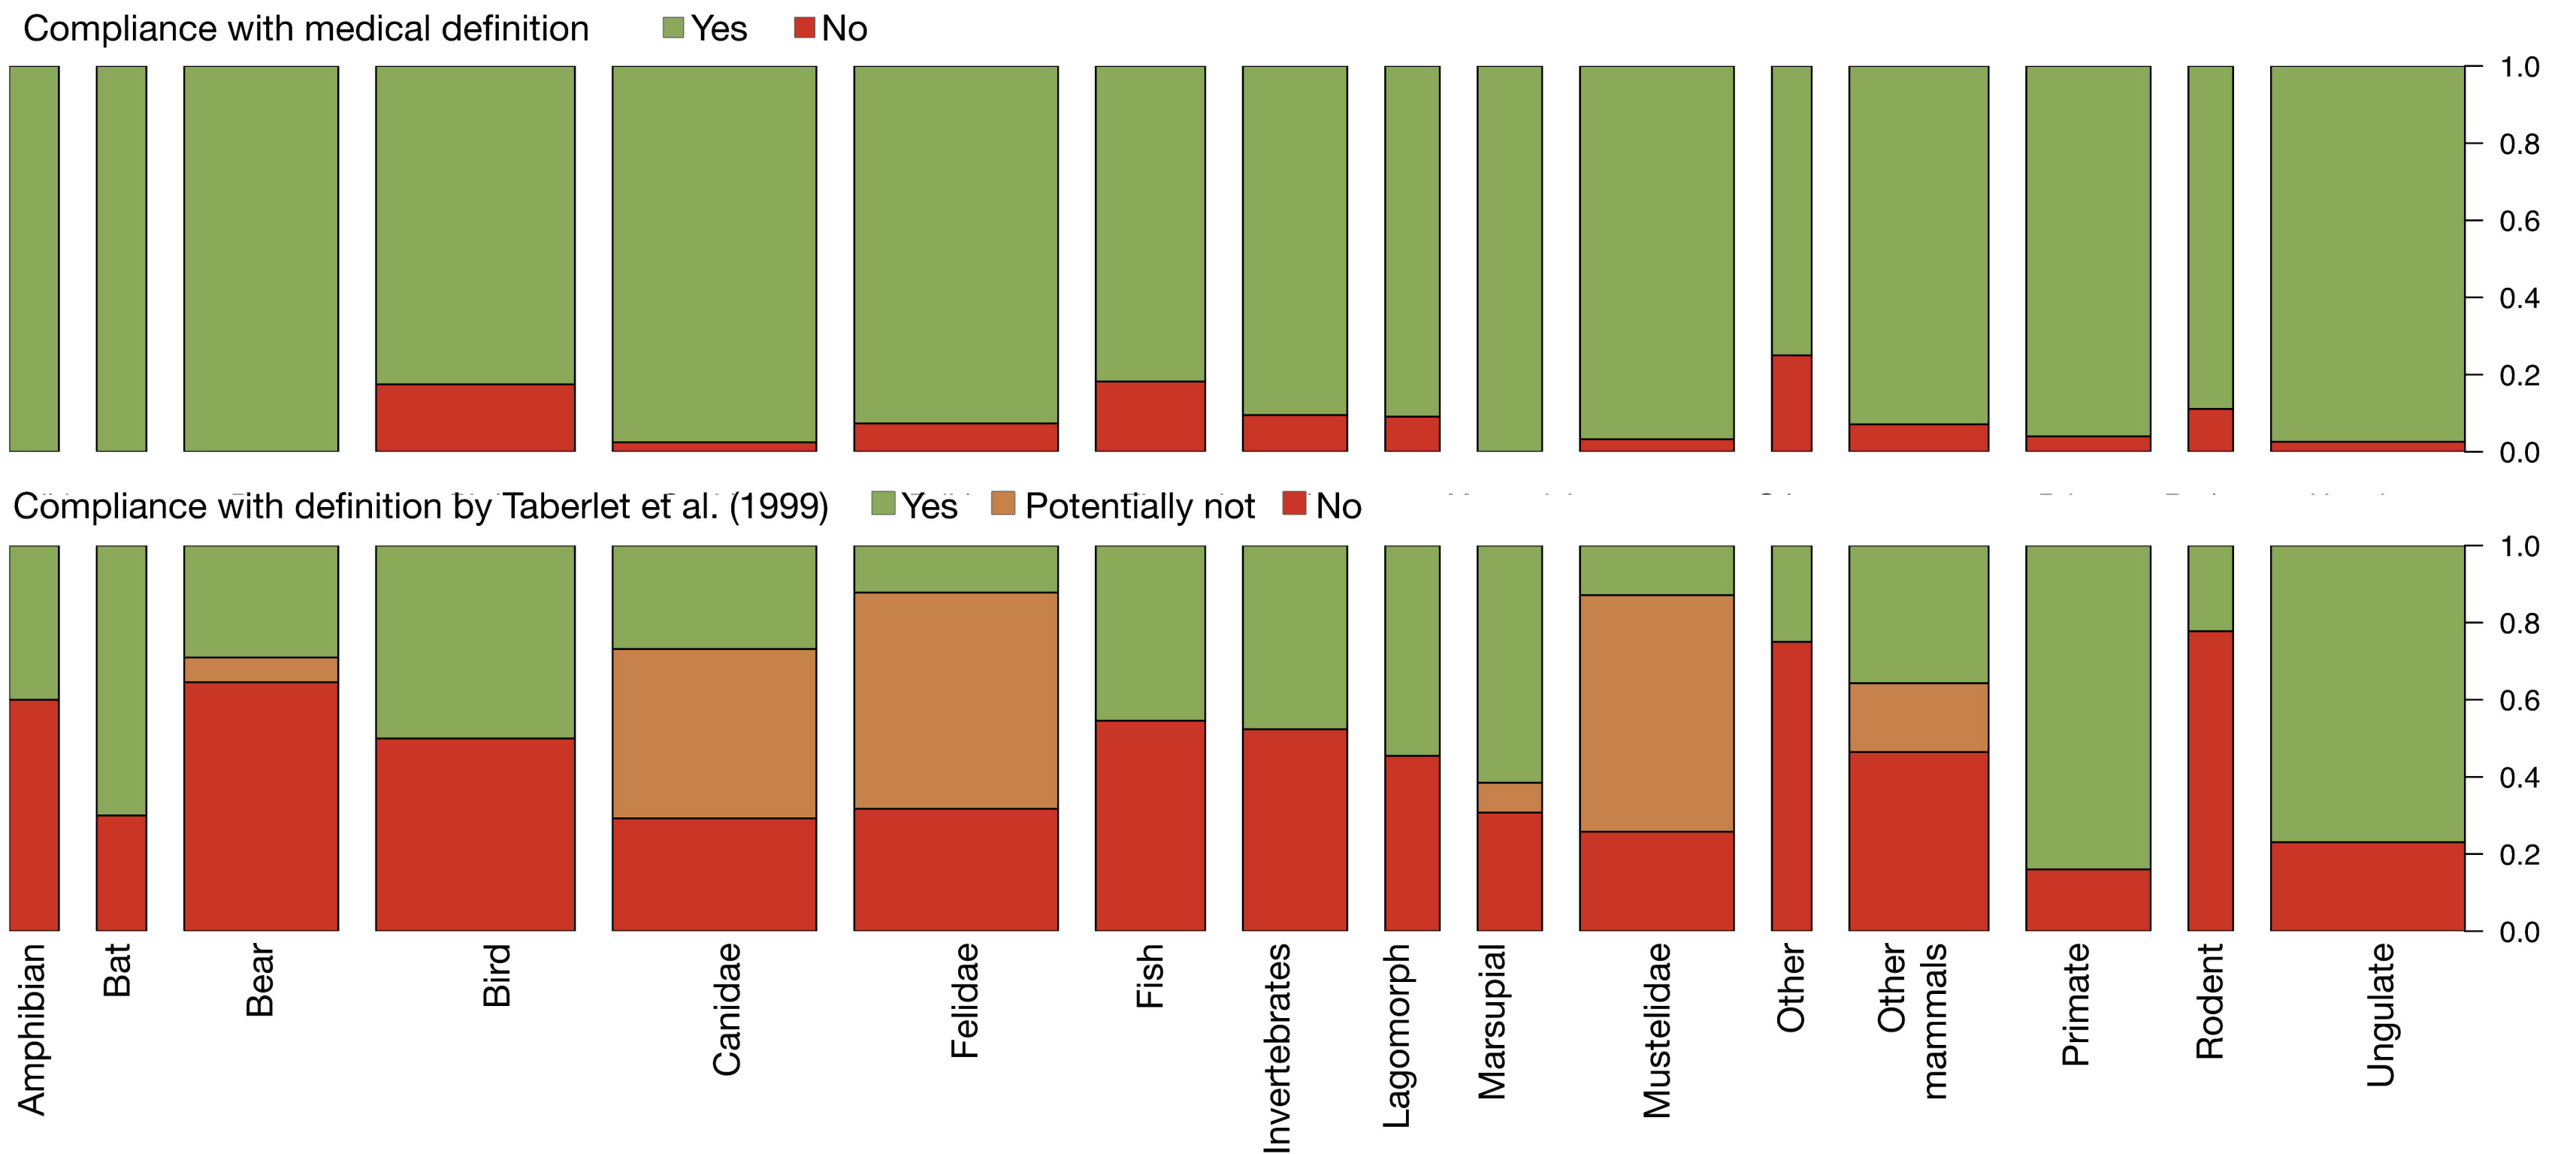

## Non-disruptive DNA sampling

### Non-invasive DNA sampling (*sensu stricto*)

#### eDNA sampling

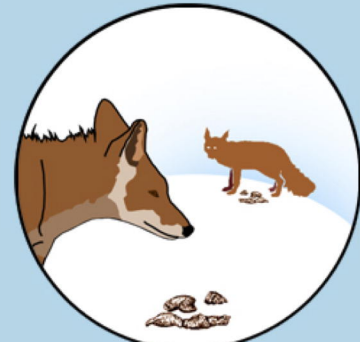

Whole faeces  
sampling

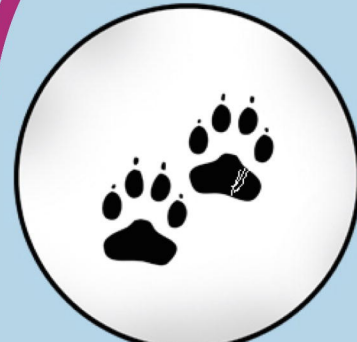

Hairs from  
tracks in snow

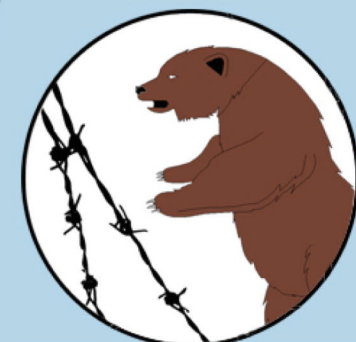

Unbaited hair trap

#### DNA trapping

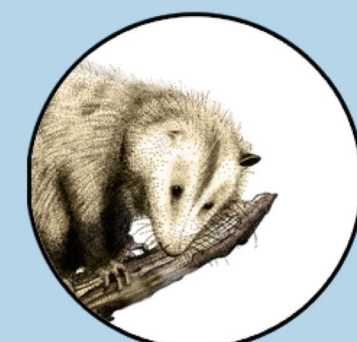

Baited DNA trap

### Non-invasive DNA sampling (*sensu lato*)

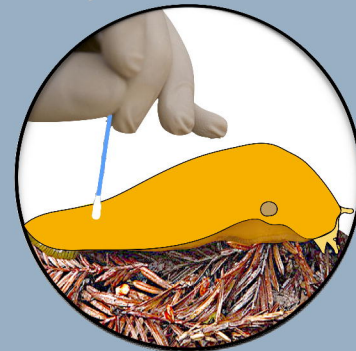

Skin swabbing without capture

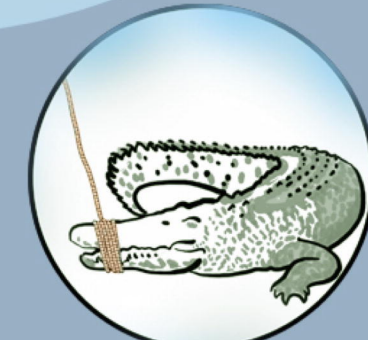

Capture for buccal swabbing

### Non-lethal DNA sampling

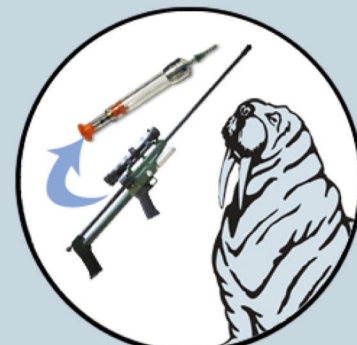

Remote biopsy by darting

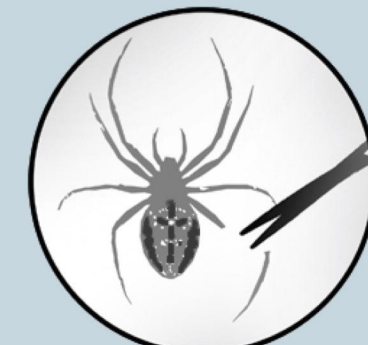

Cutting body parts
